# Supplementary material for: Improving global paleogeography since the latePaleozoic using paleobiology
Source: Copernicus journal article supplement (doi:10.5194/bg-2017-94), 2017-04-18

## Interactive comment on “Improving global paleogeography since the late Paleozoic using paleobiology” by Wenchao Cao et al.

Wenchao Cao et al.

[wenchao.cao@sydney.edu.au](mailto:wenchao.cao@sydney.edu.au)

**Supplement. Top panels.** Test between the global paleogeography reconstructed using the plate motion model of Matthews et al. (2016) with gaps fixed and the paleo-environments indicated by the marine fossil collections from the Paleobiology Database. **Middle panels.** Areas modified (blue) to resolve the test inconsistencies. **Bottom panels.** Test between the revised paleogeography and the same marine fossil collections. Results are presented for all time slices. Mollweide projection with 0°E central meridian.

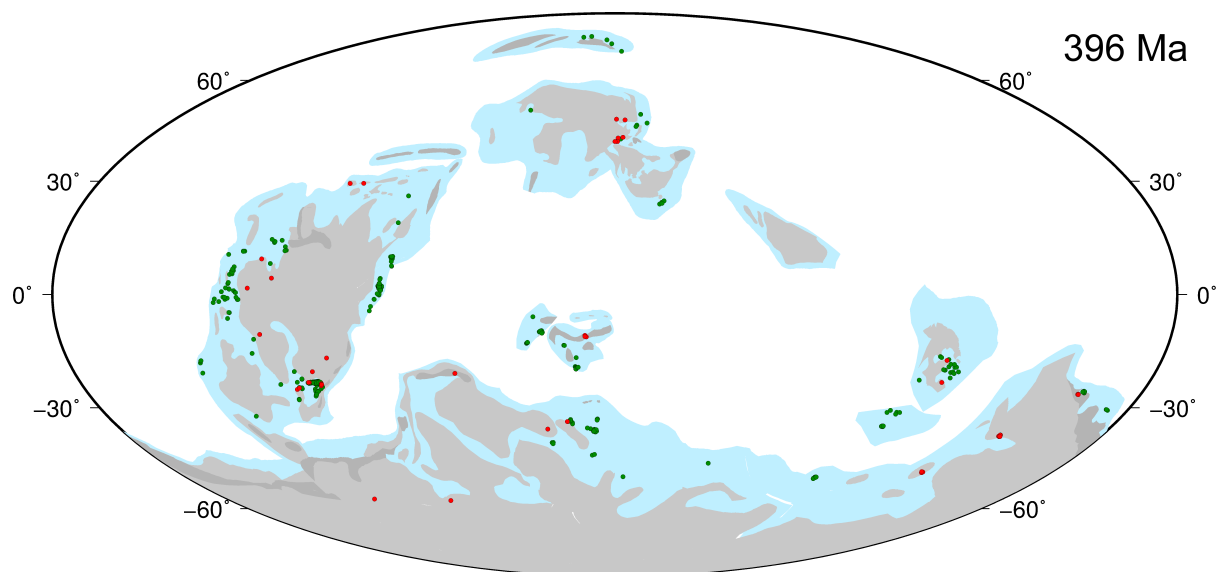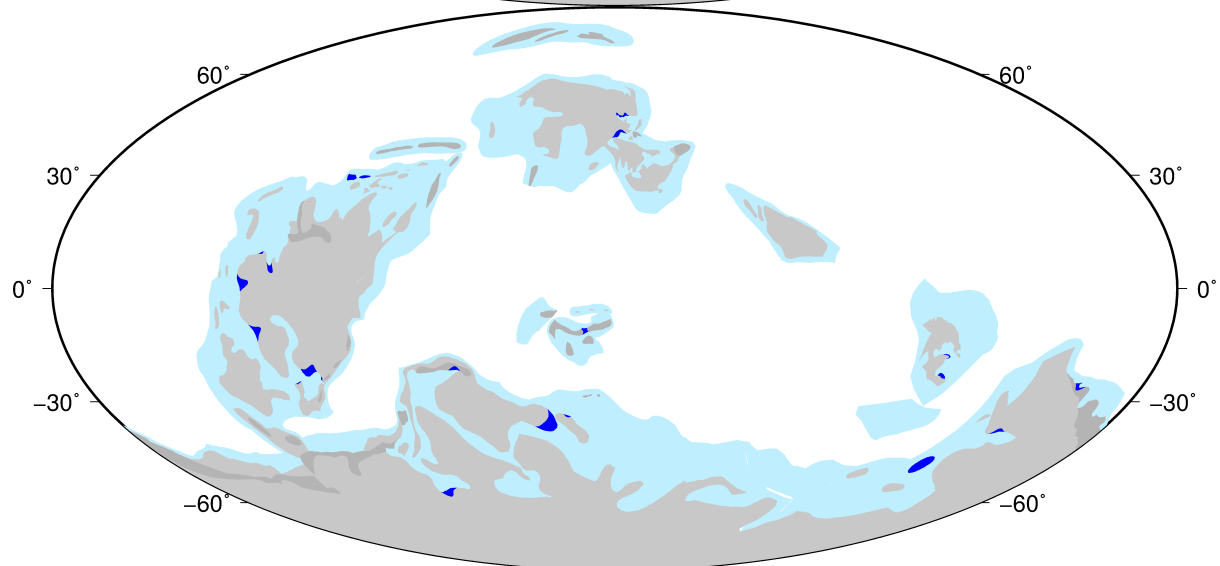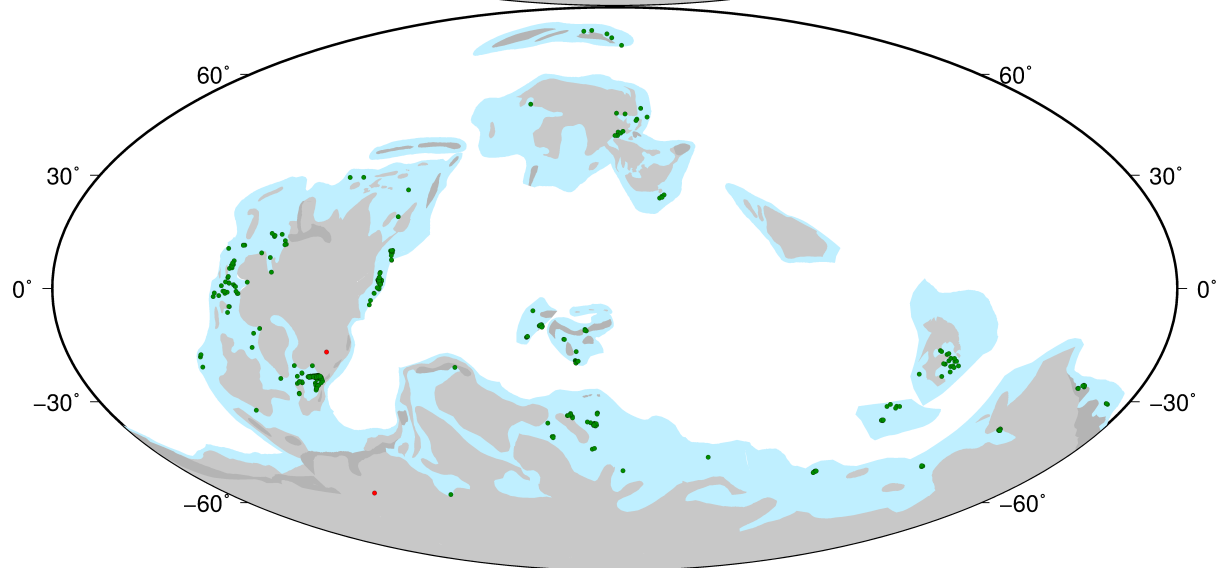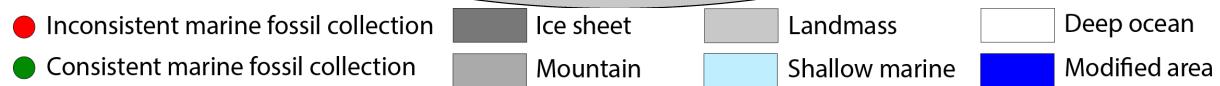



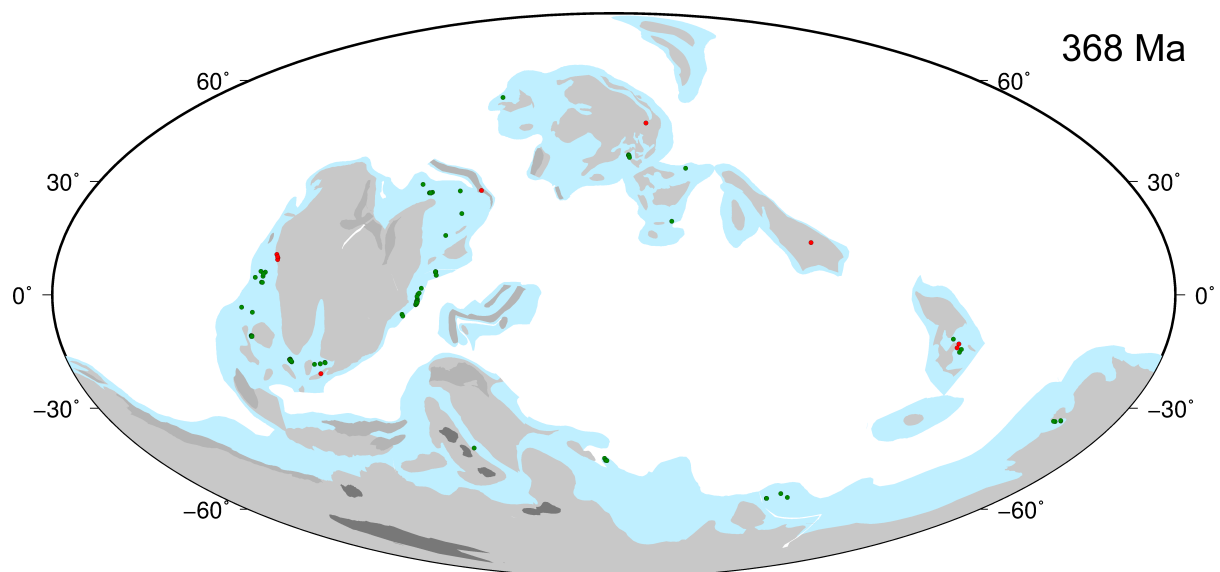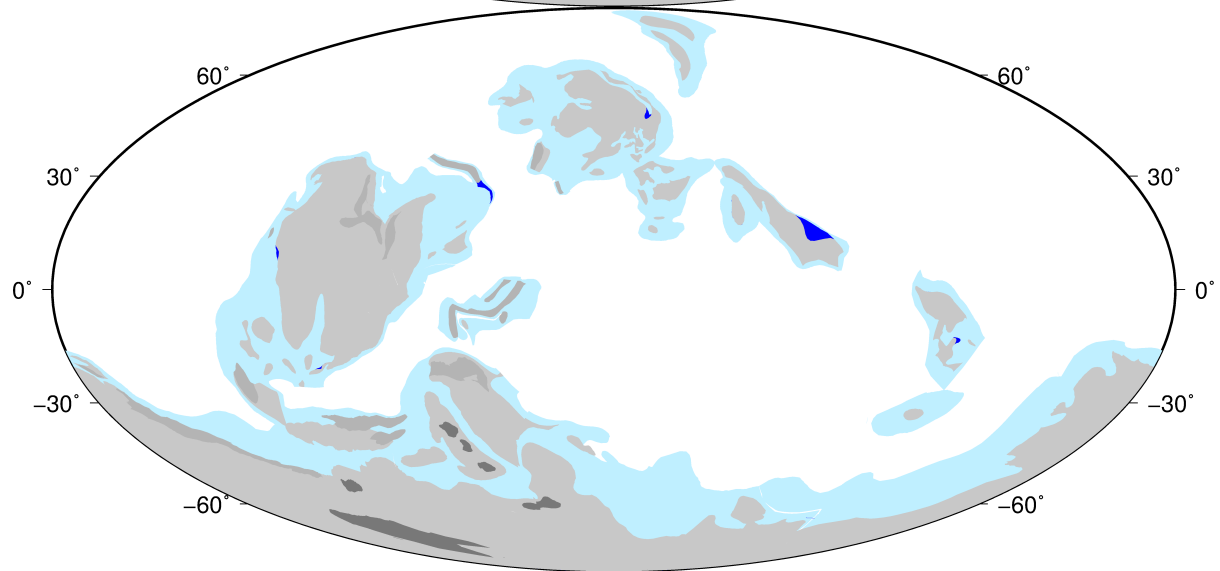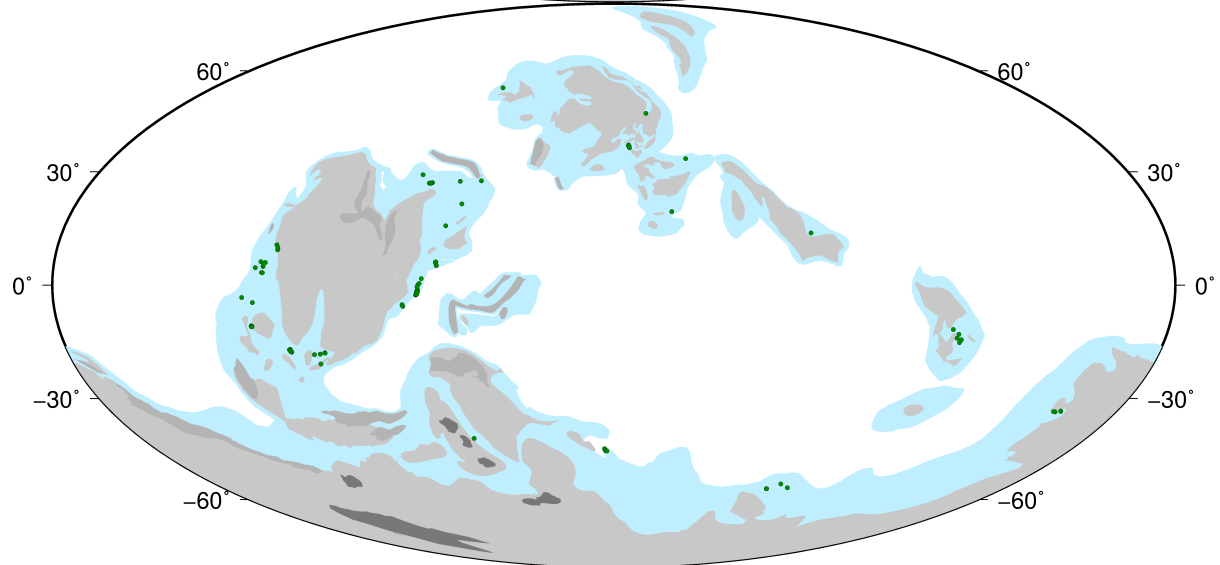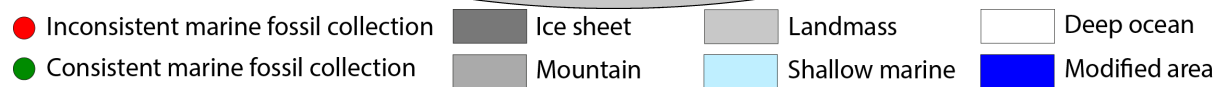

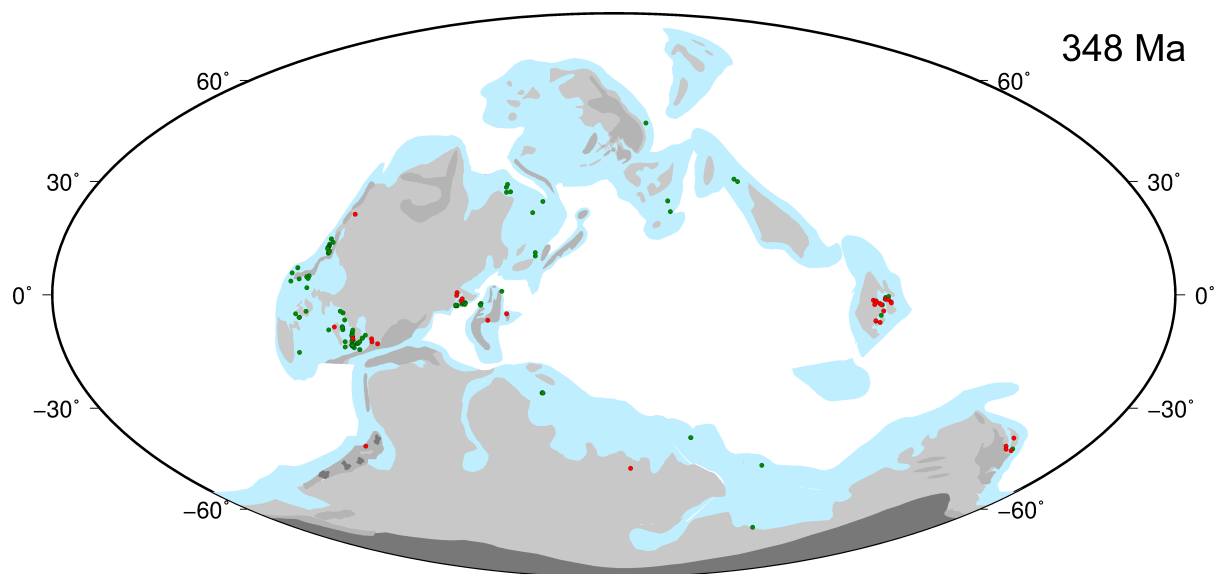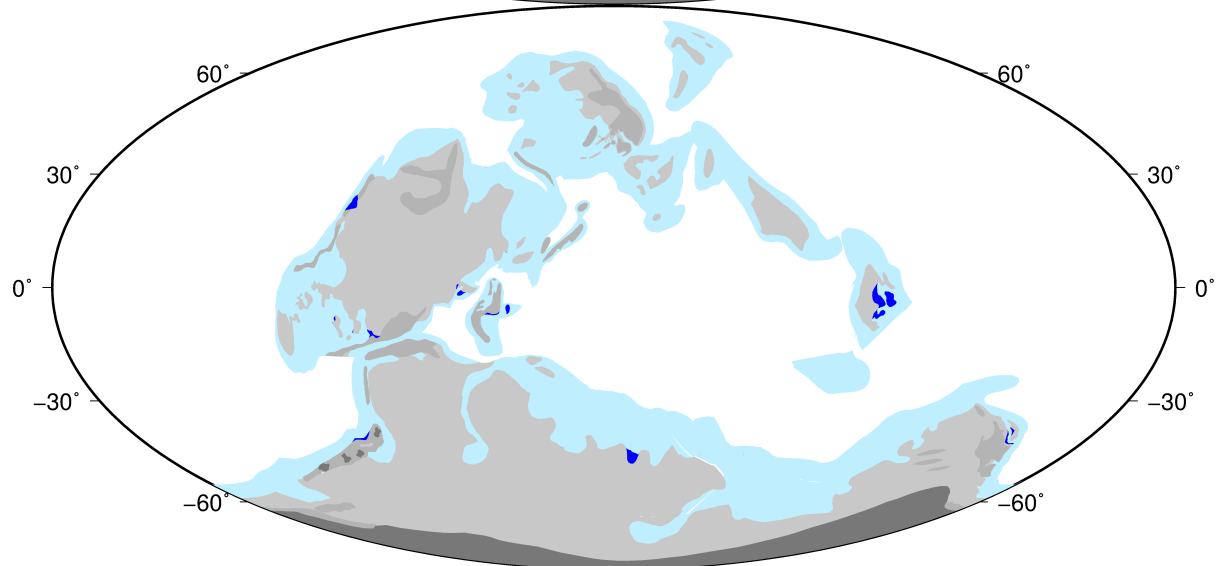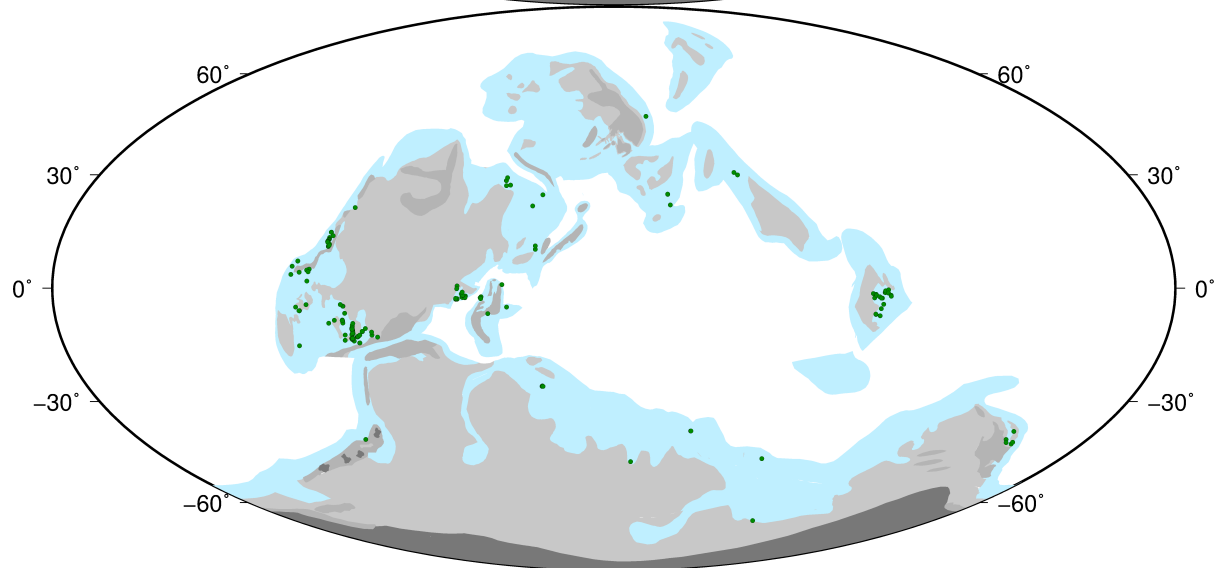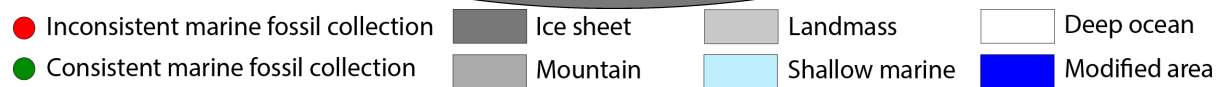

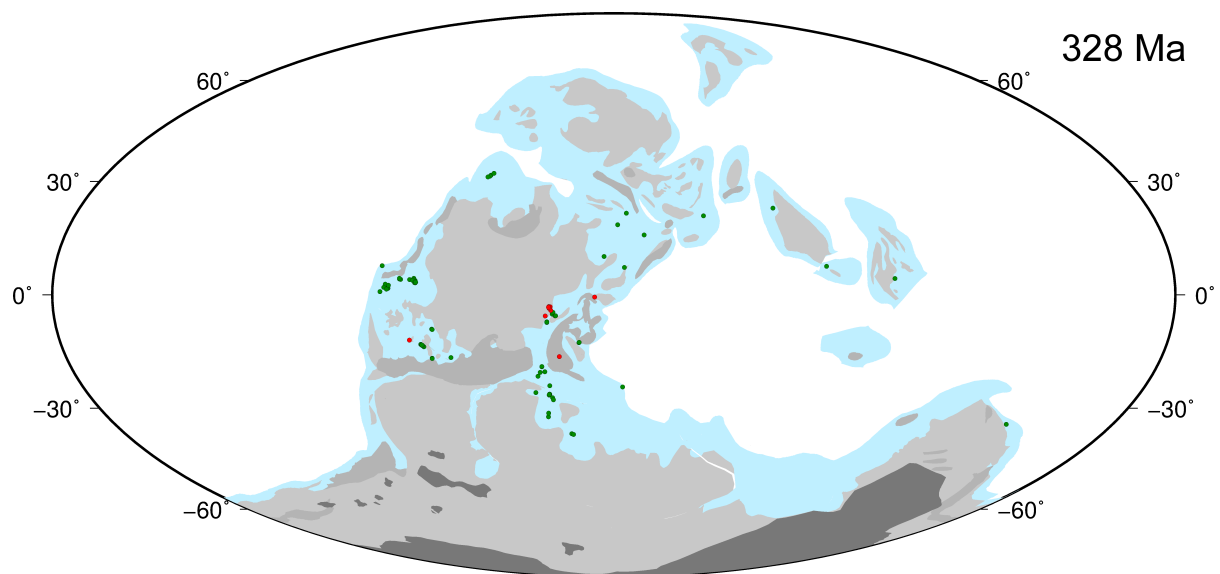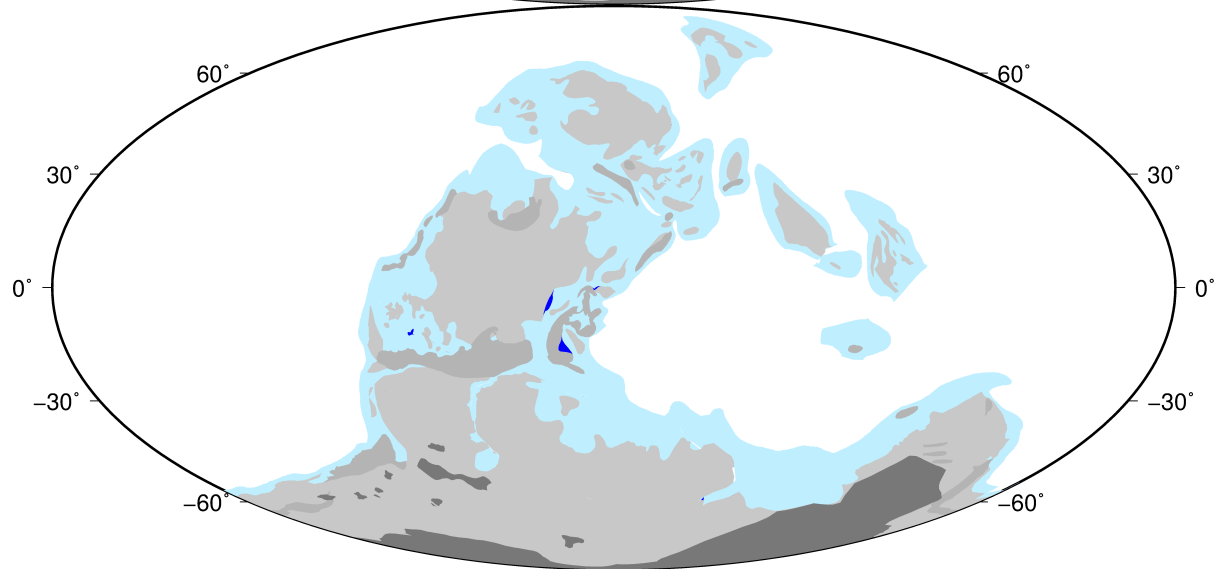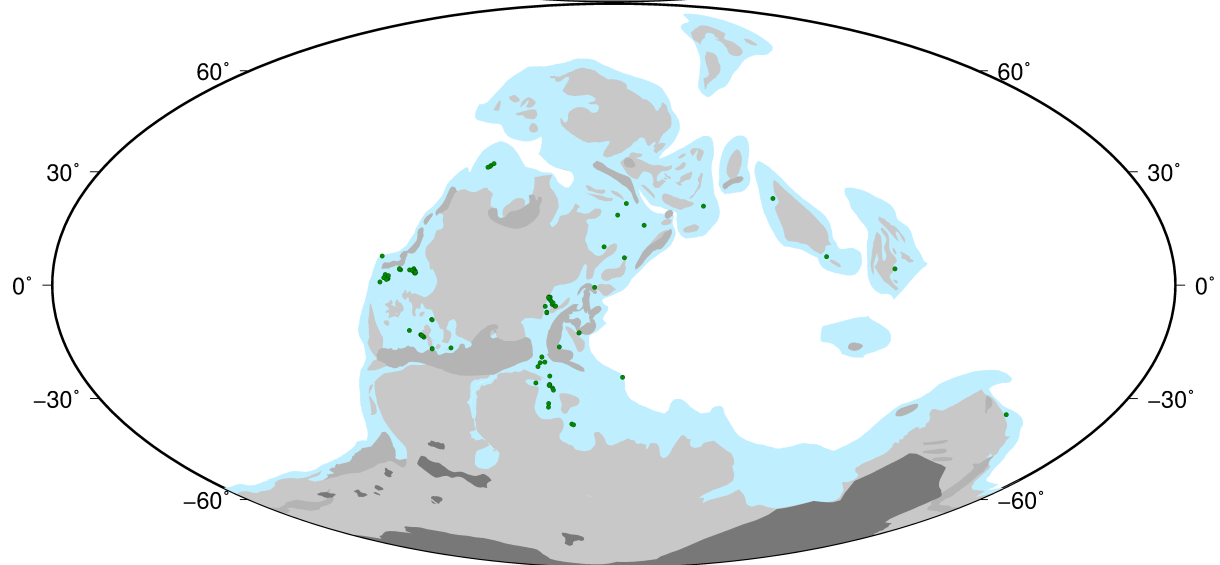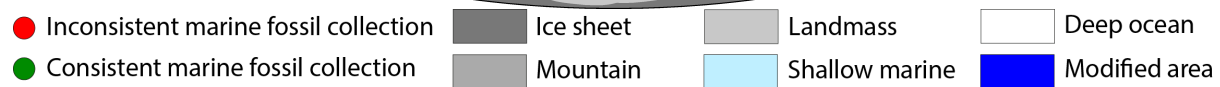

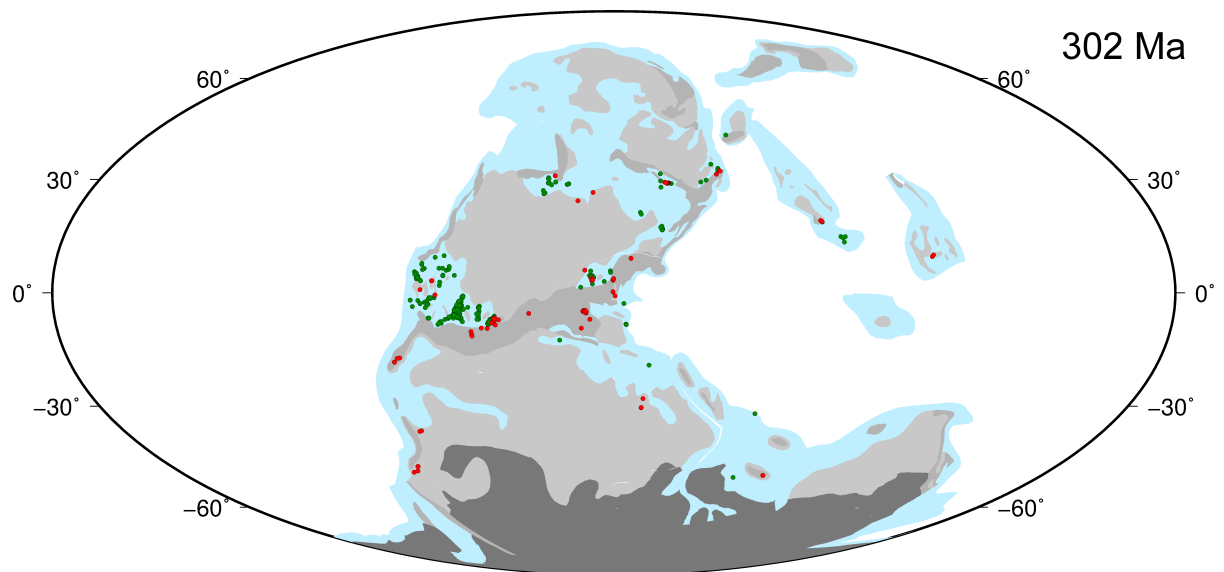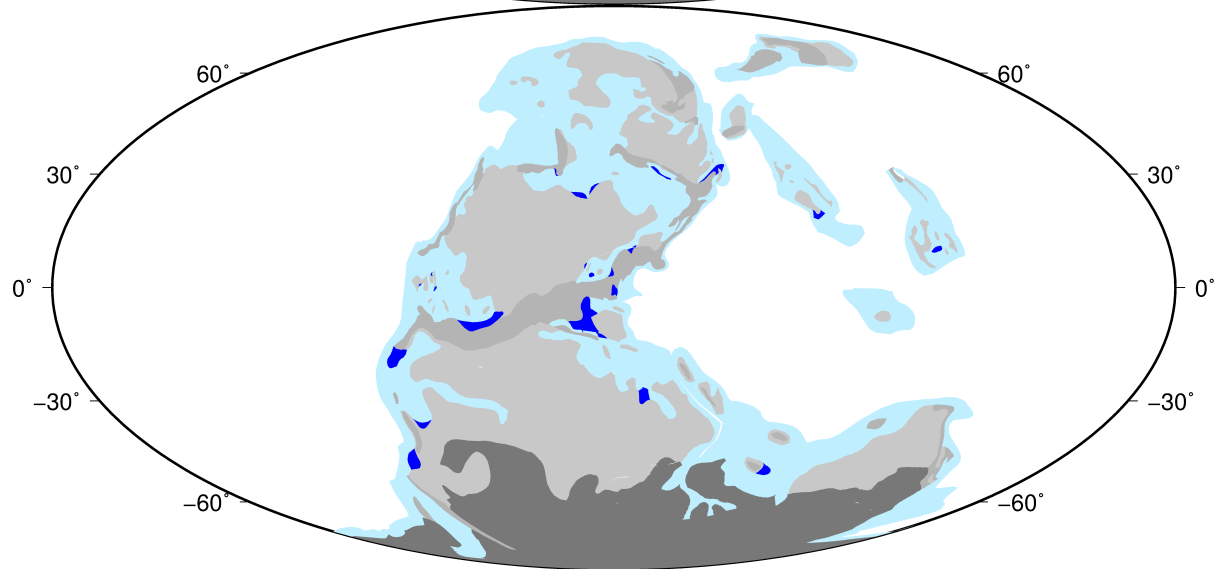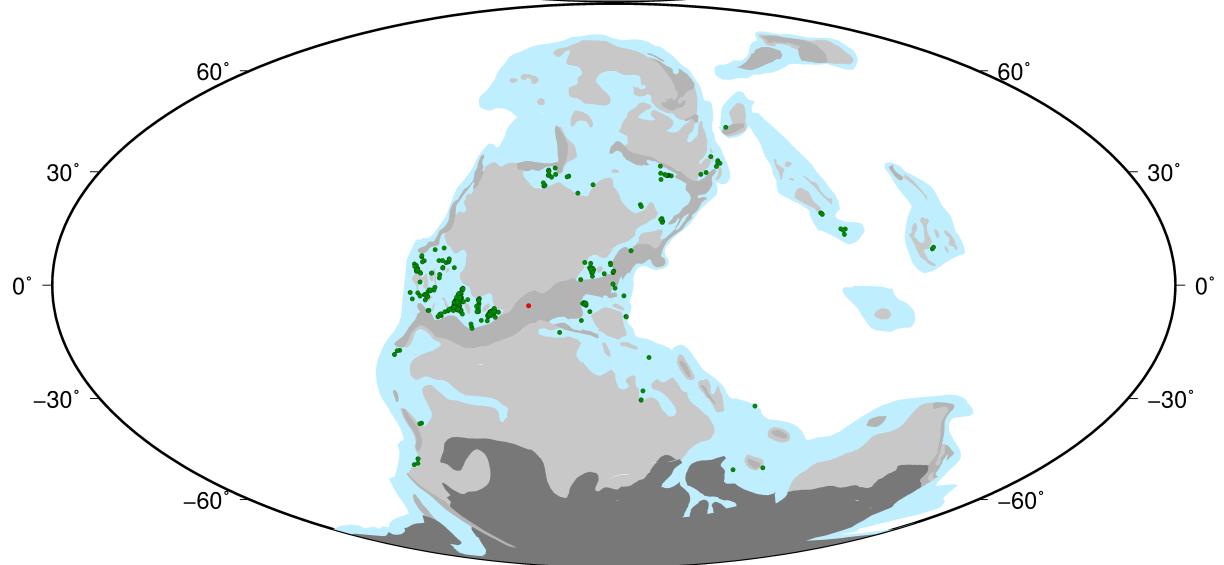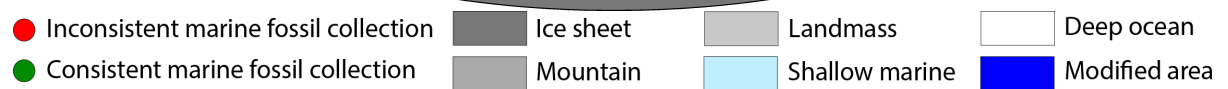

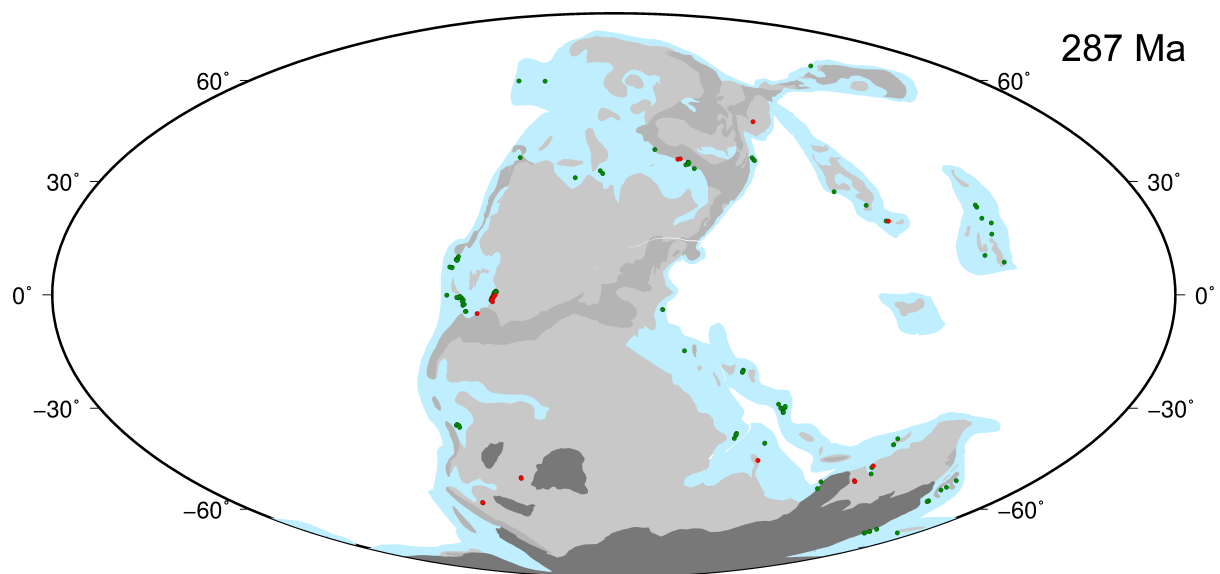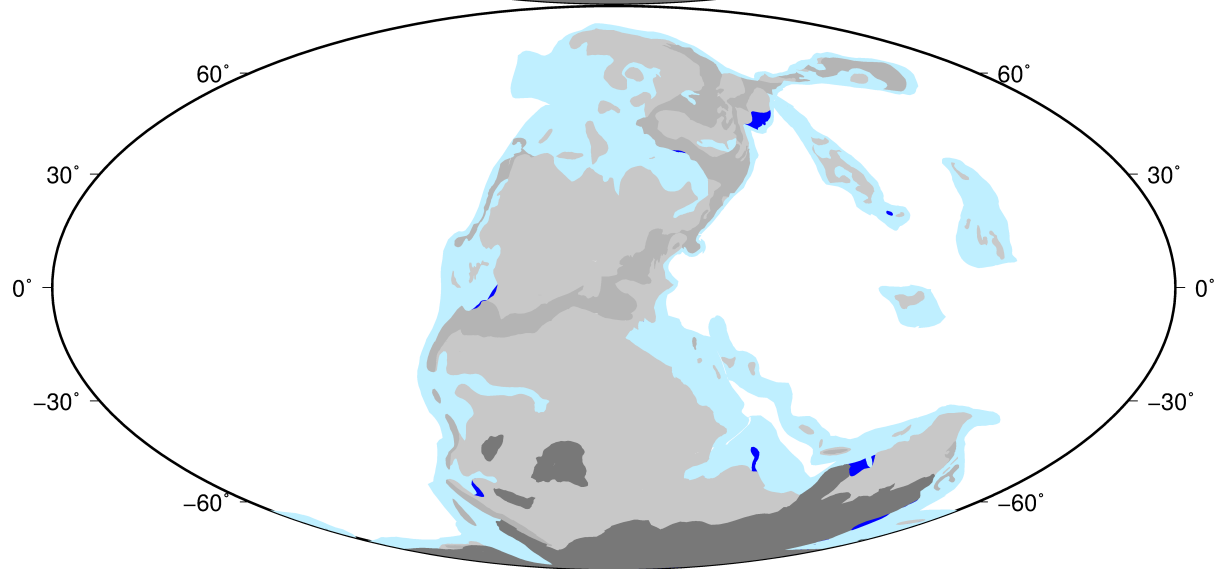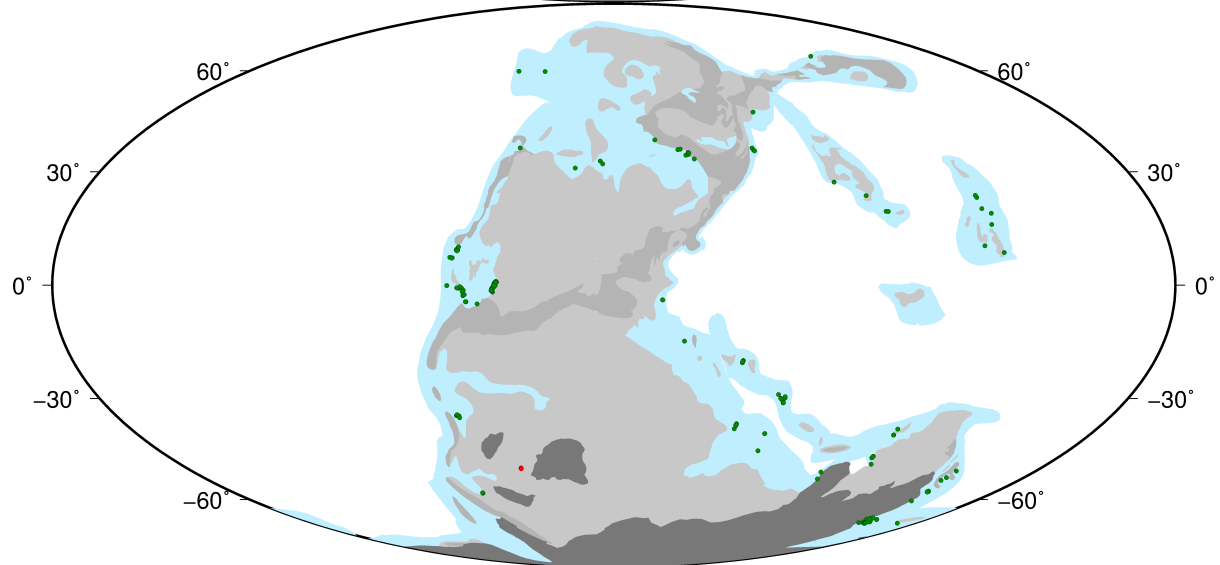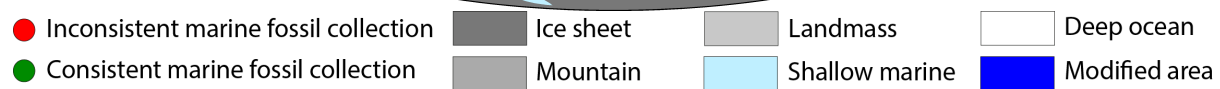

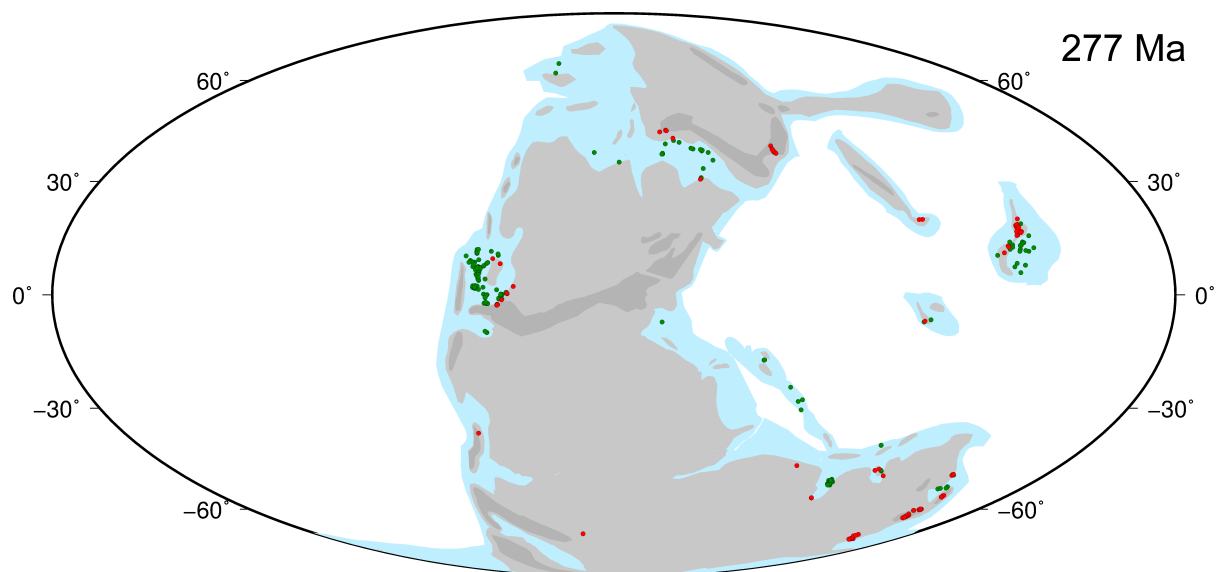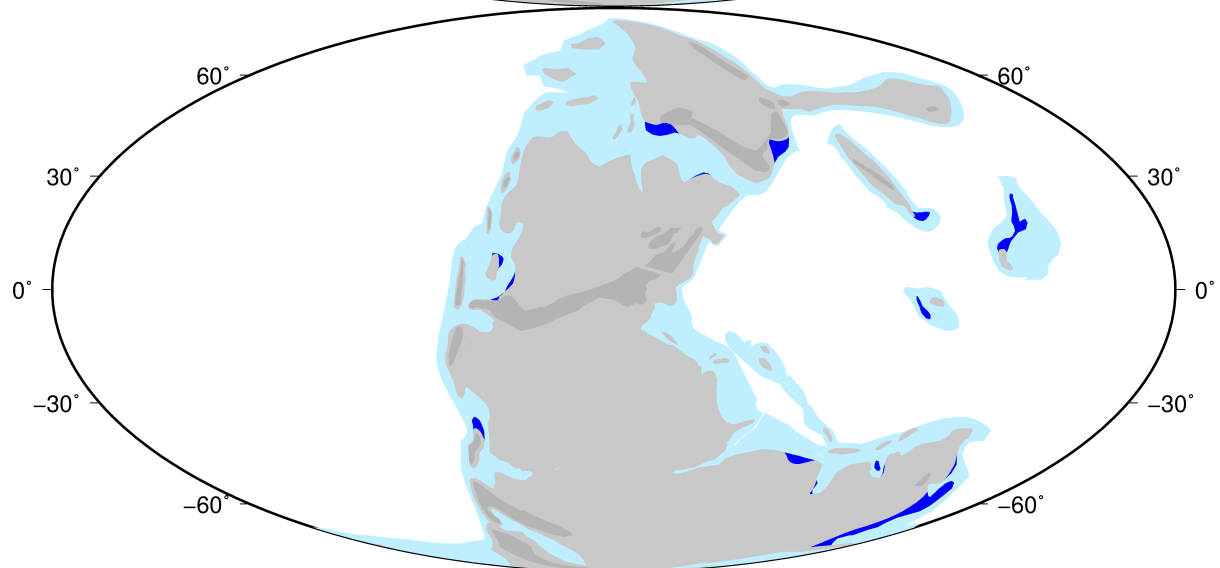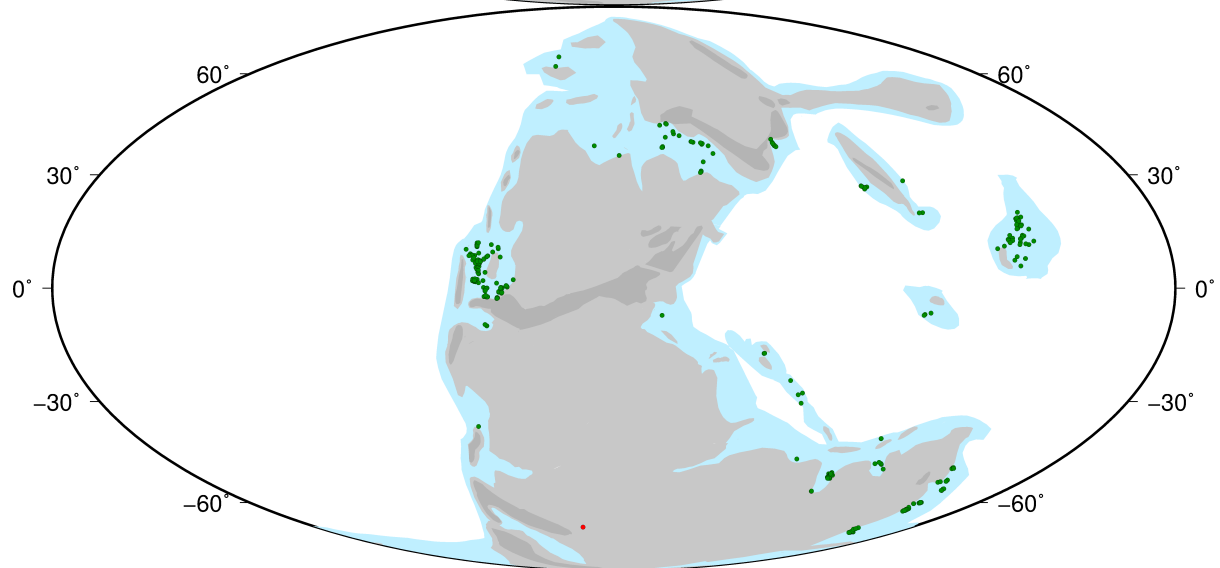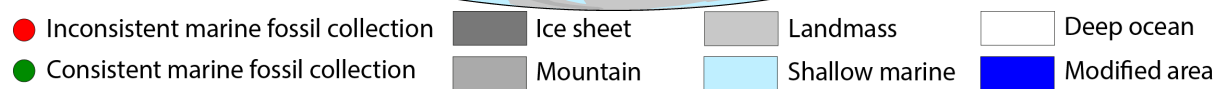

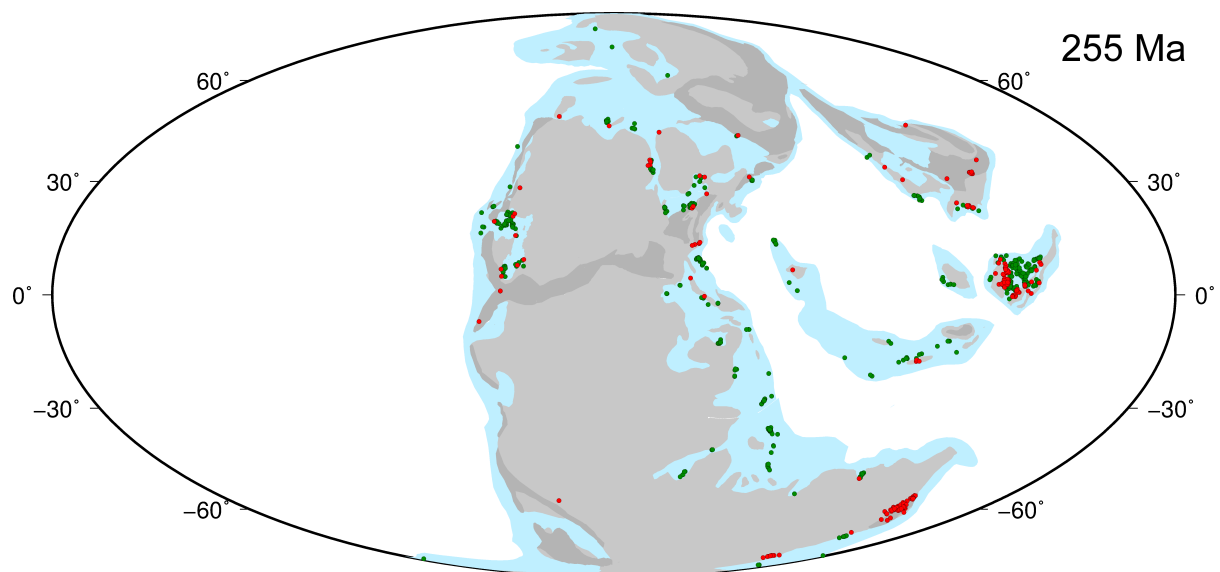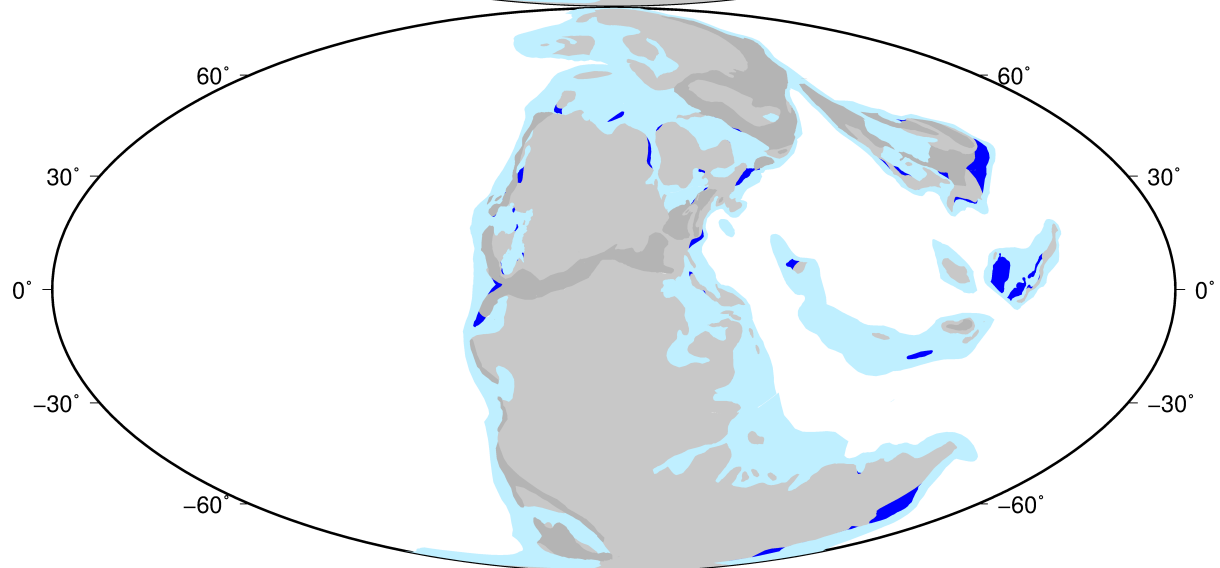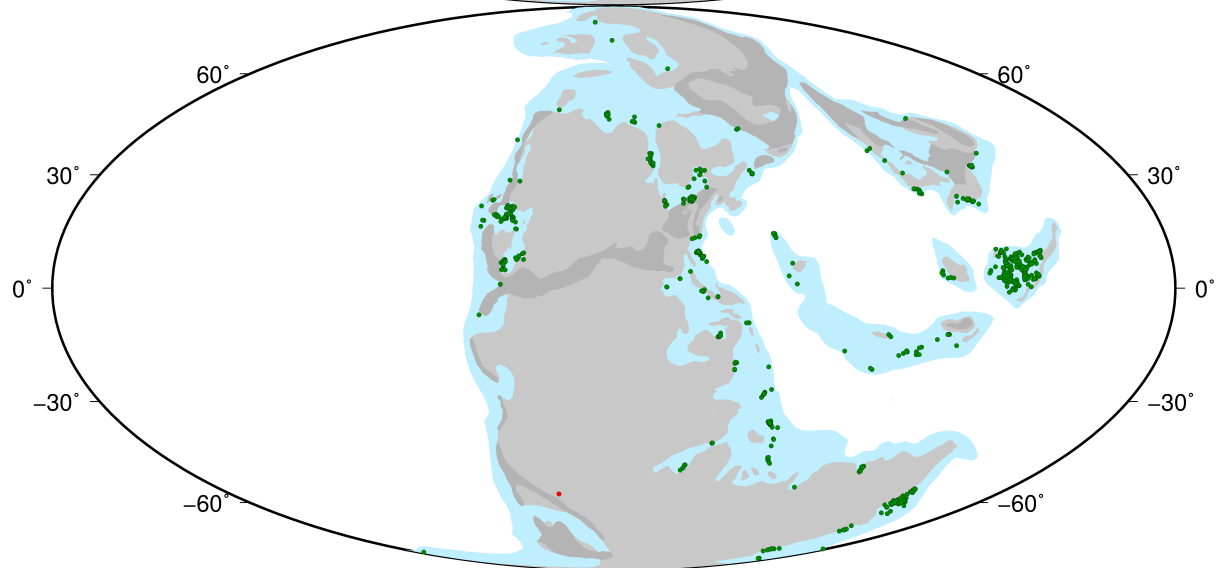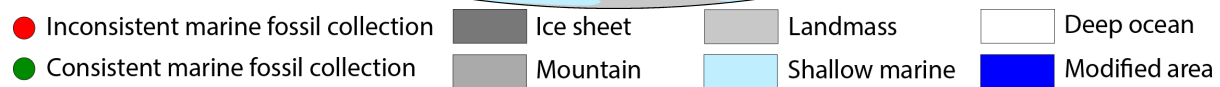

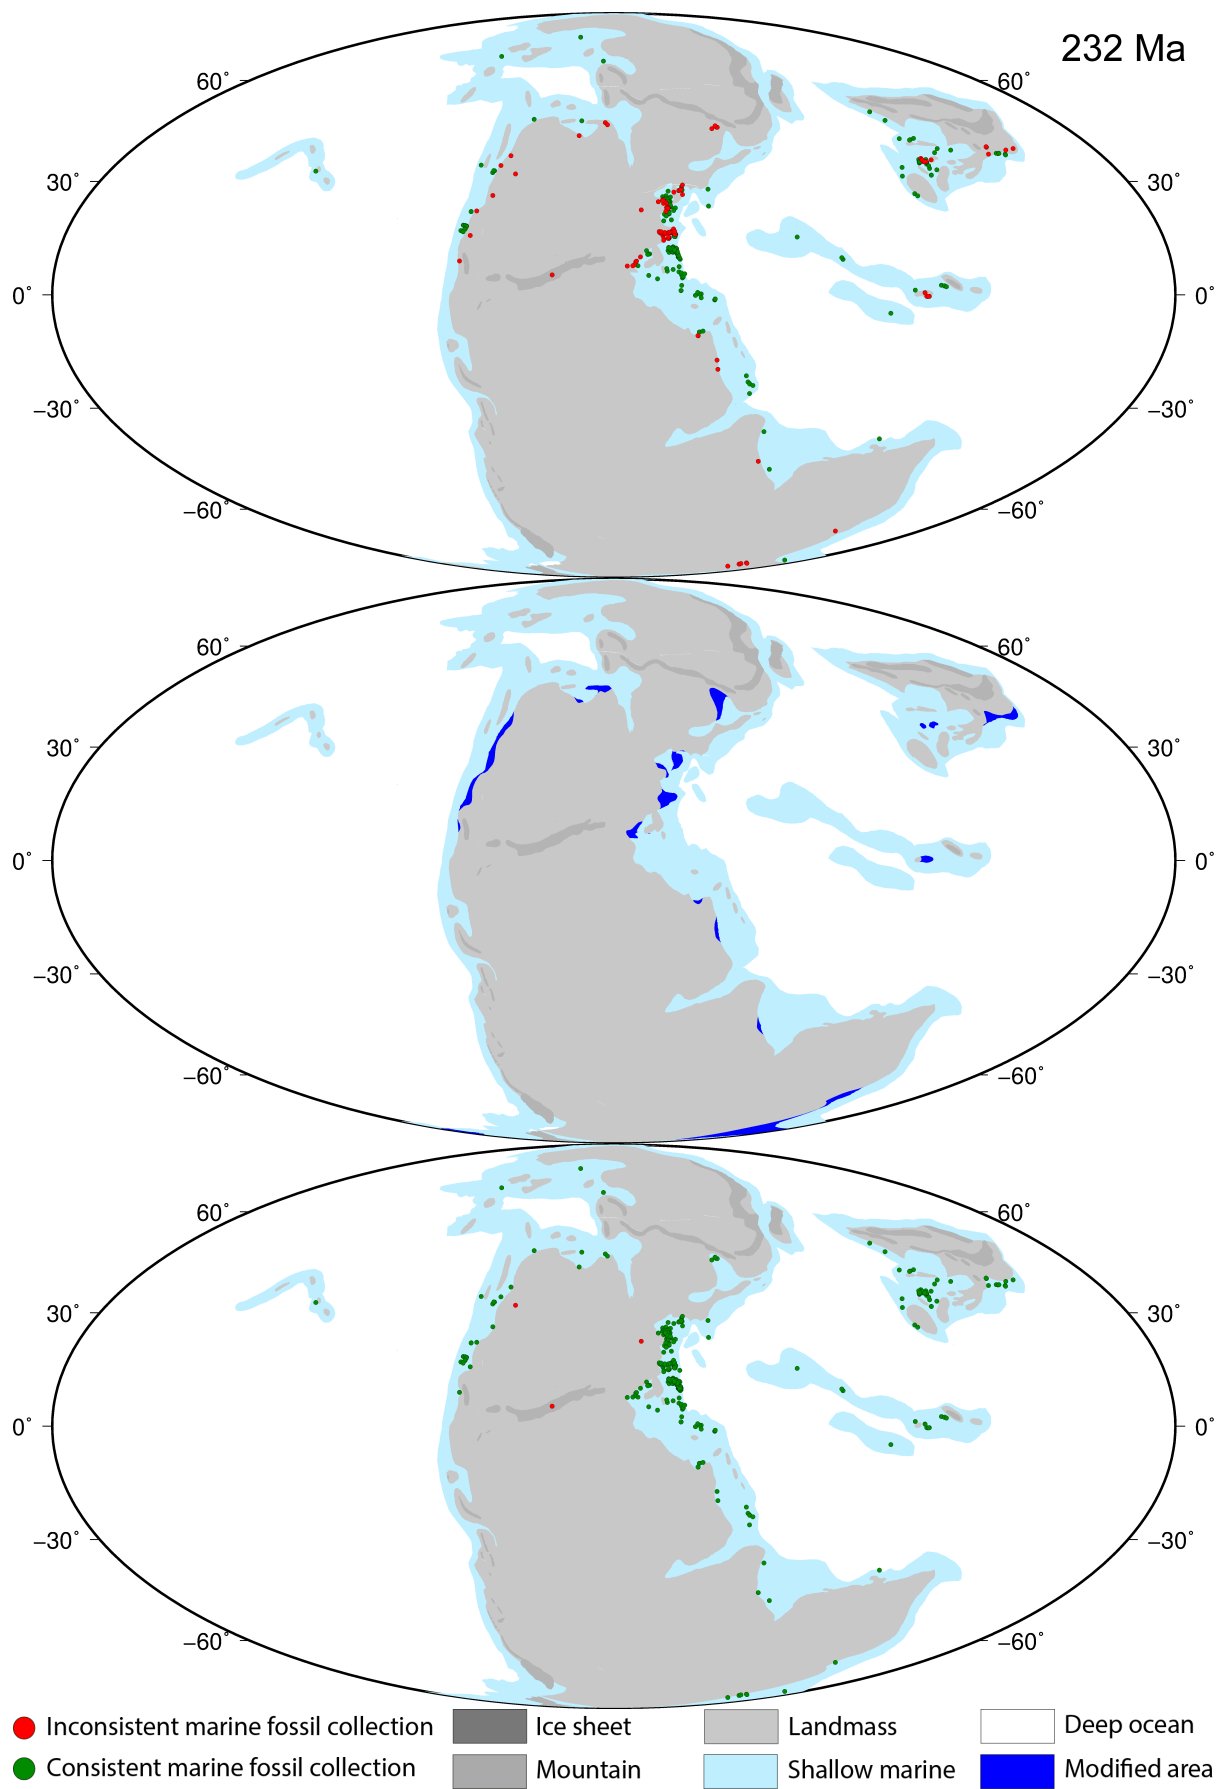



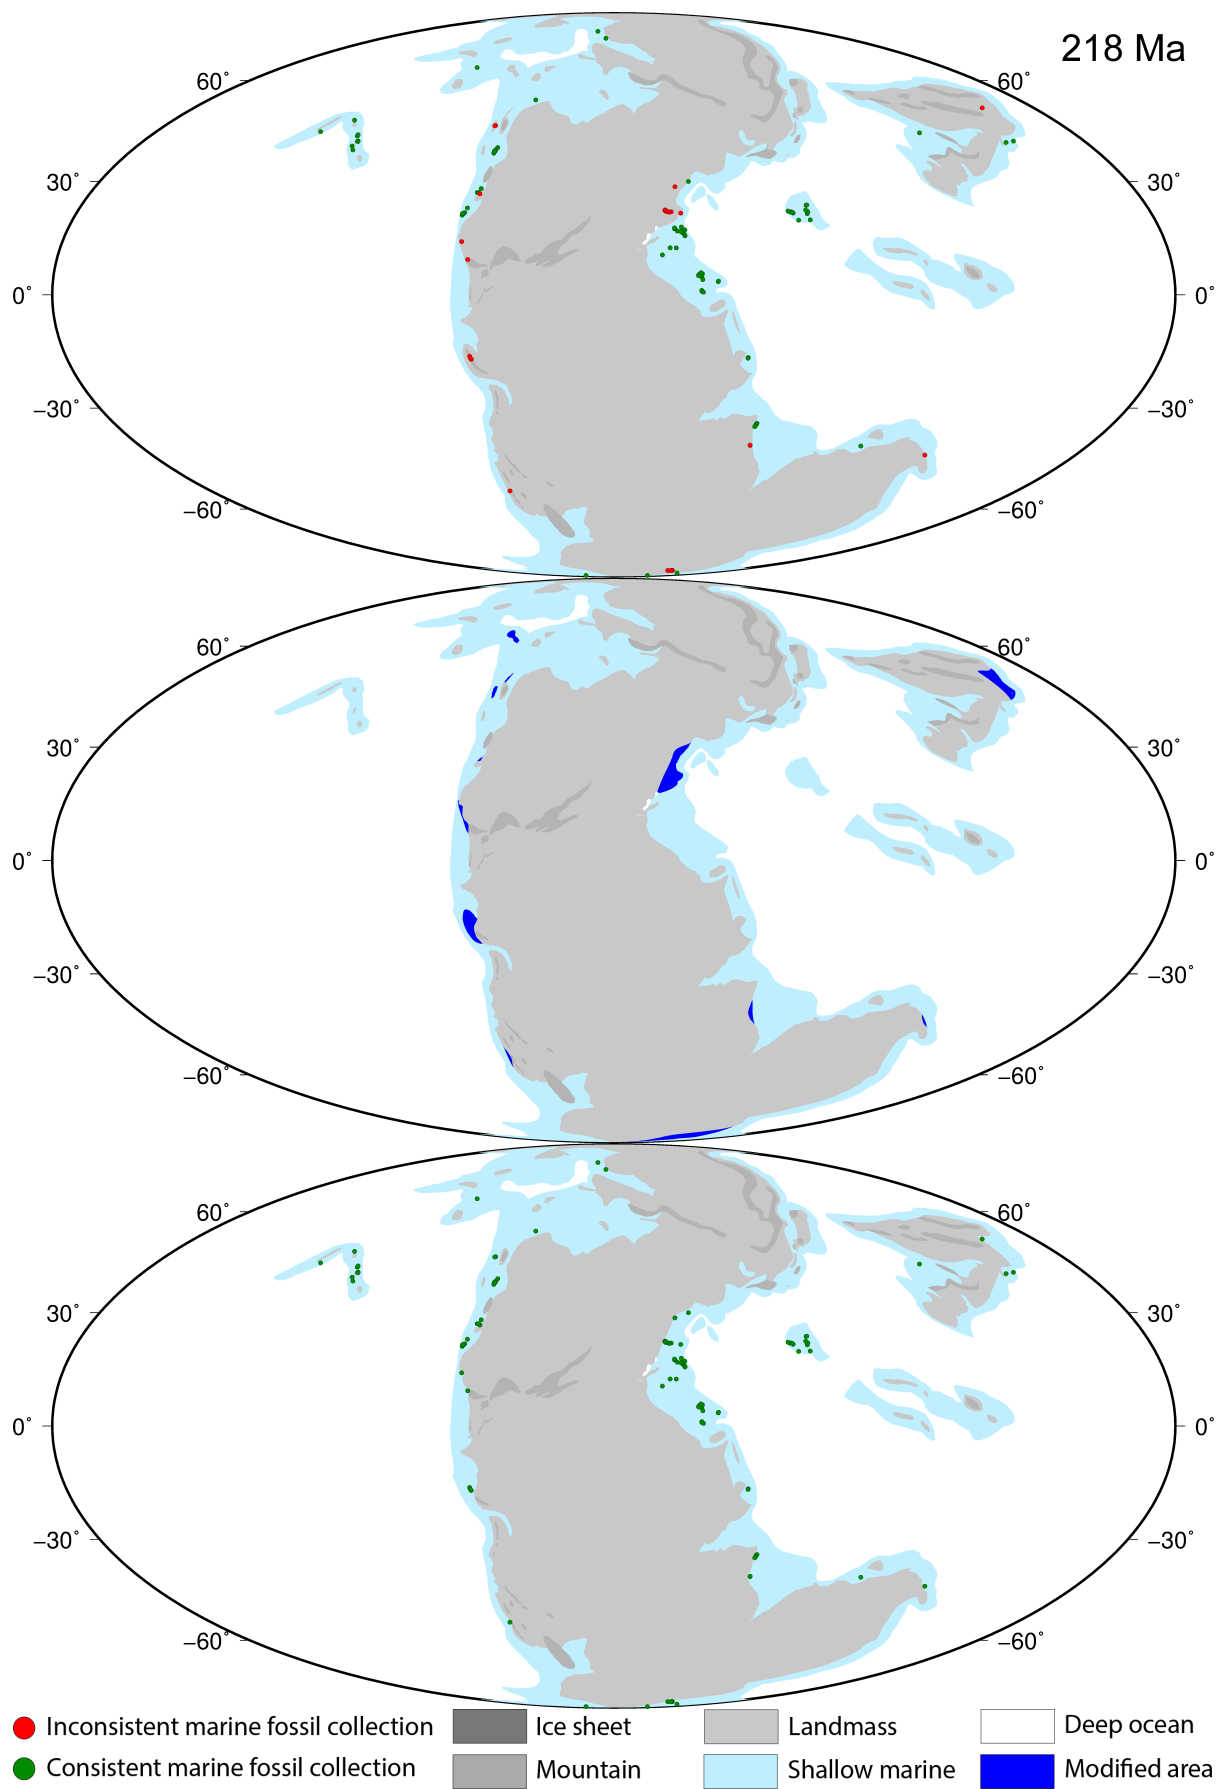

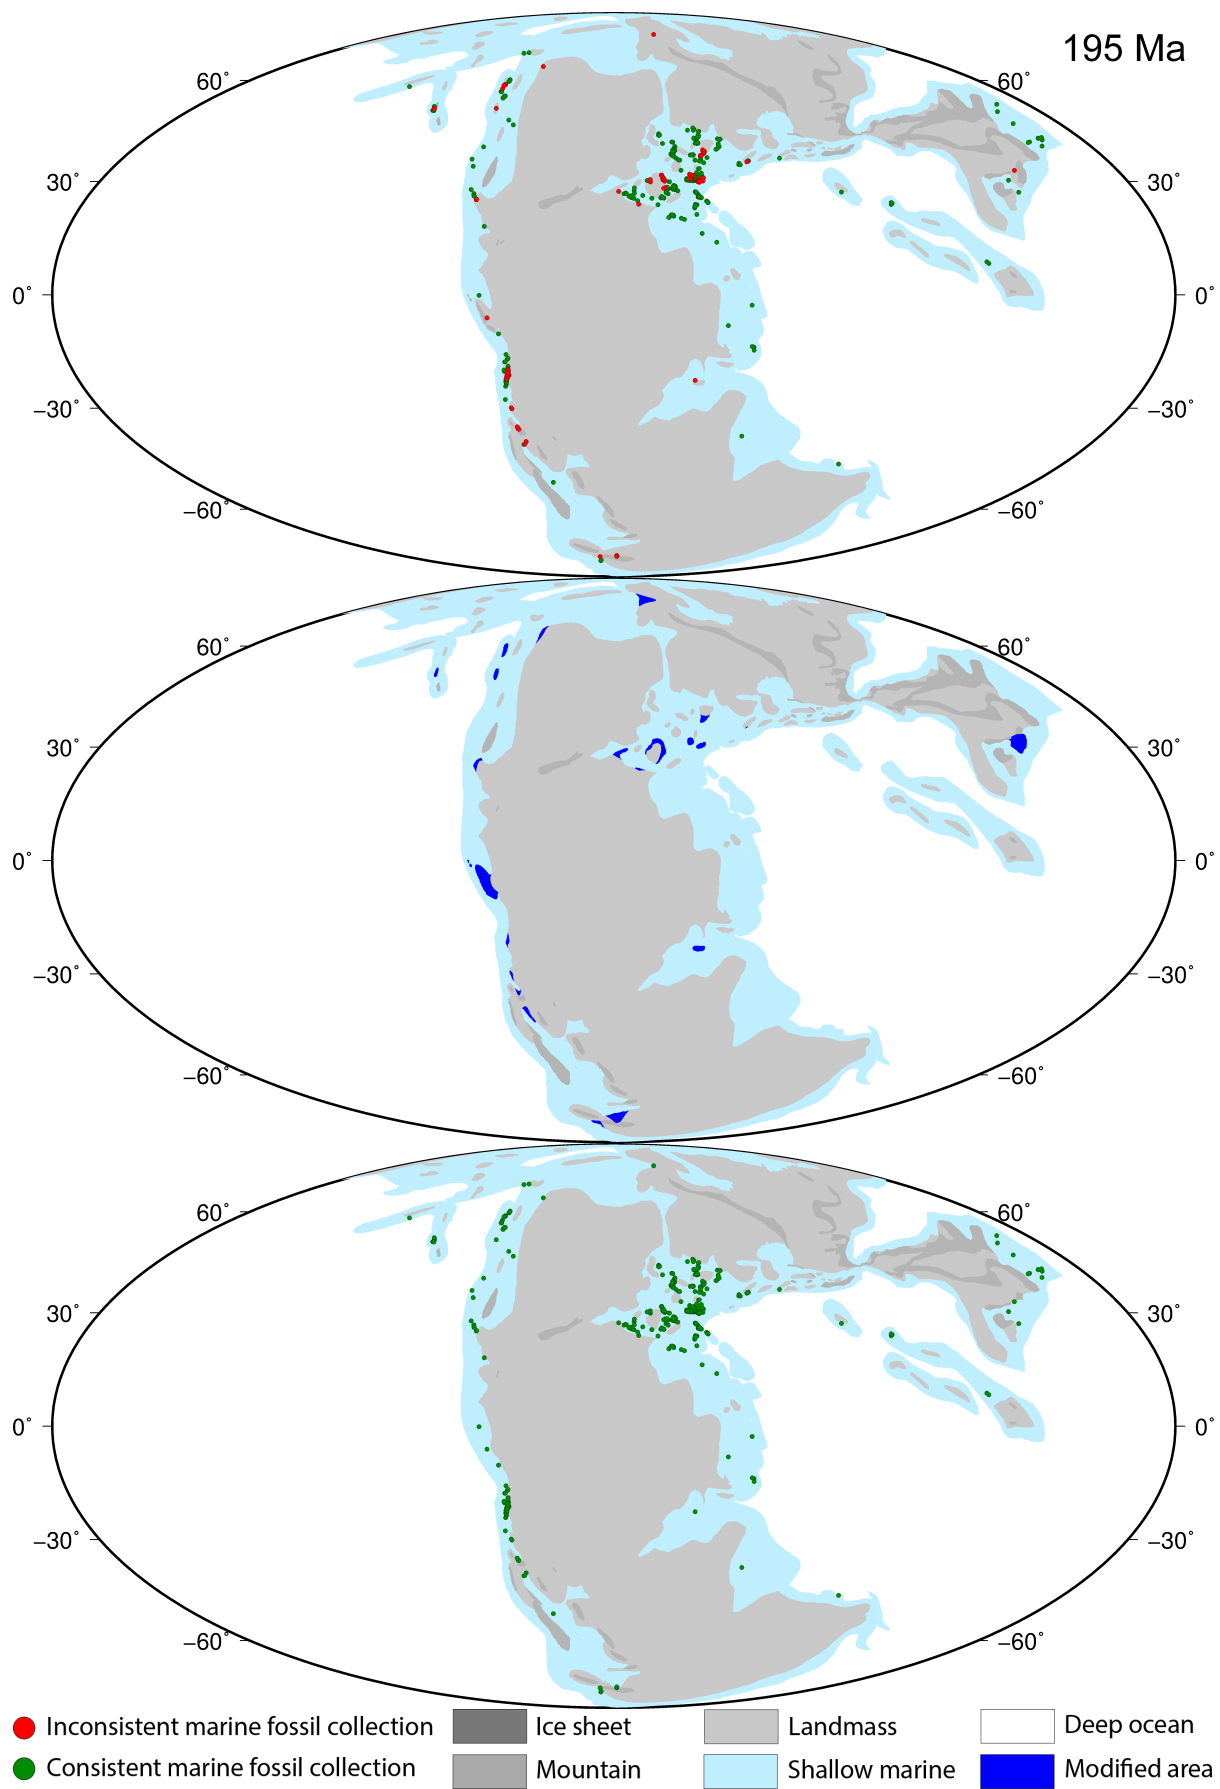

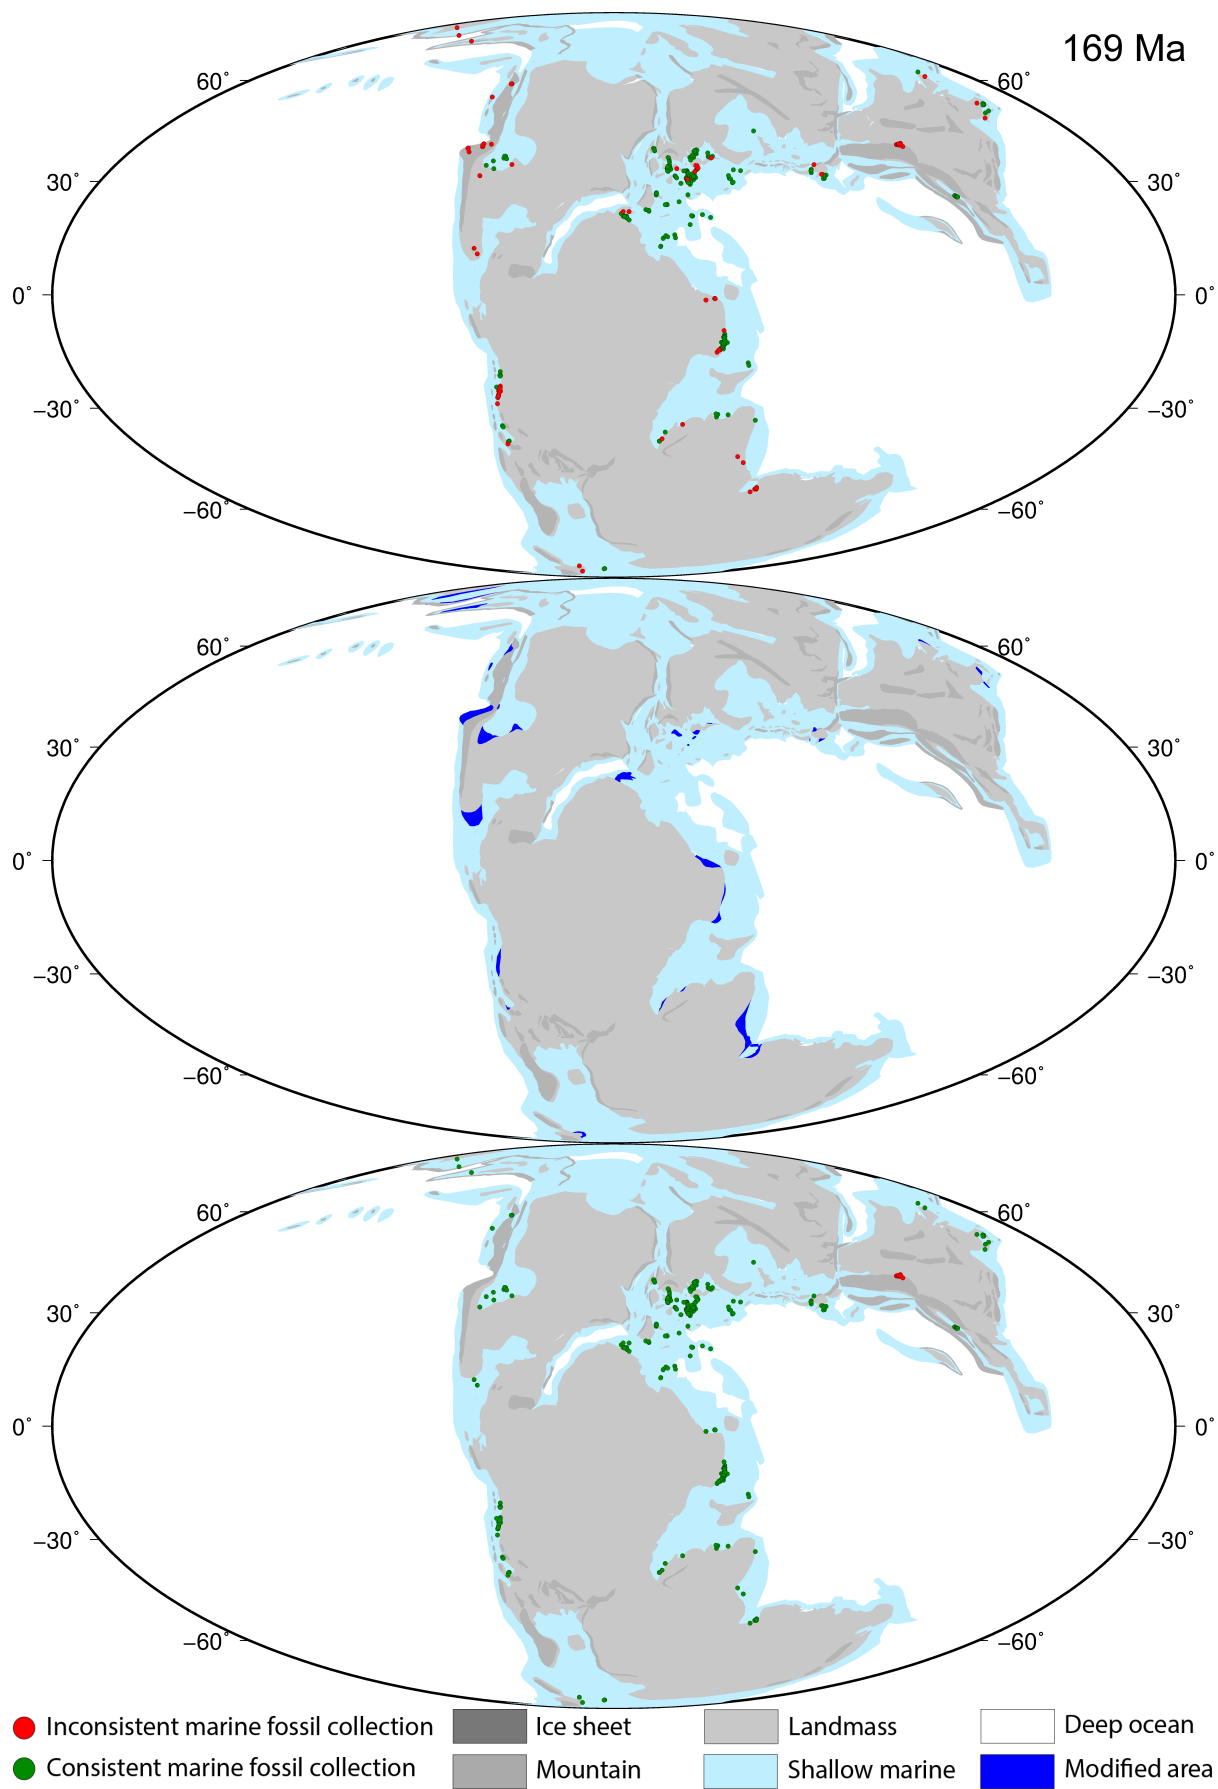

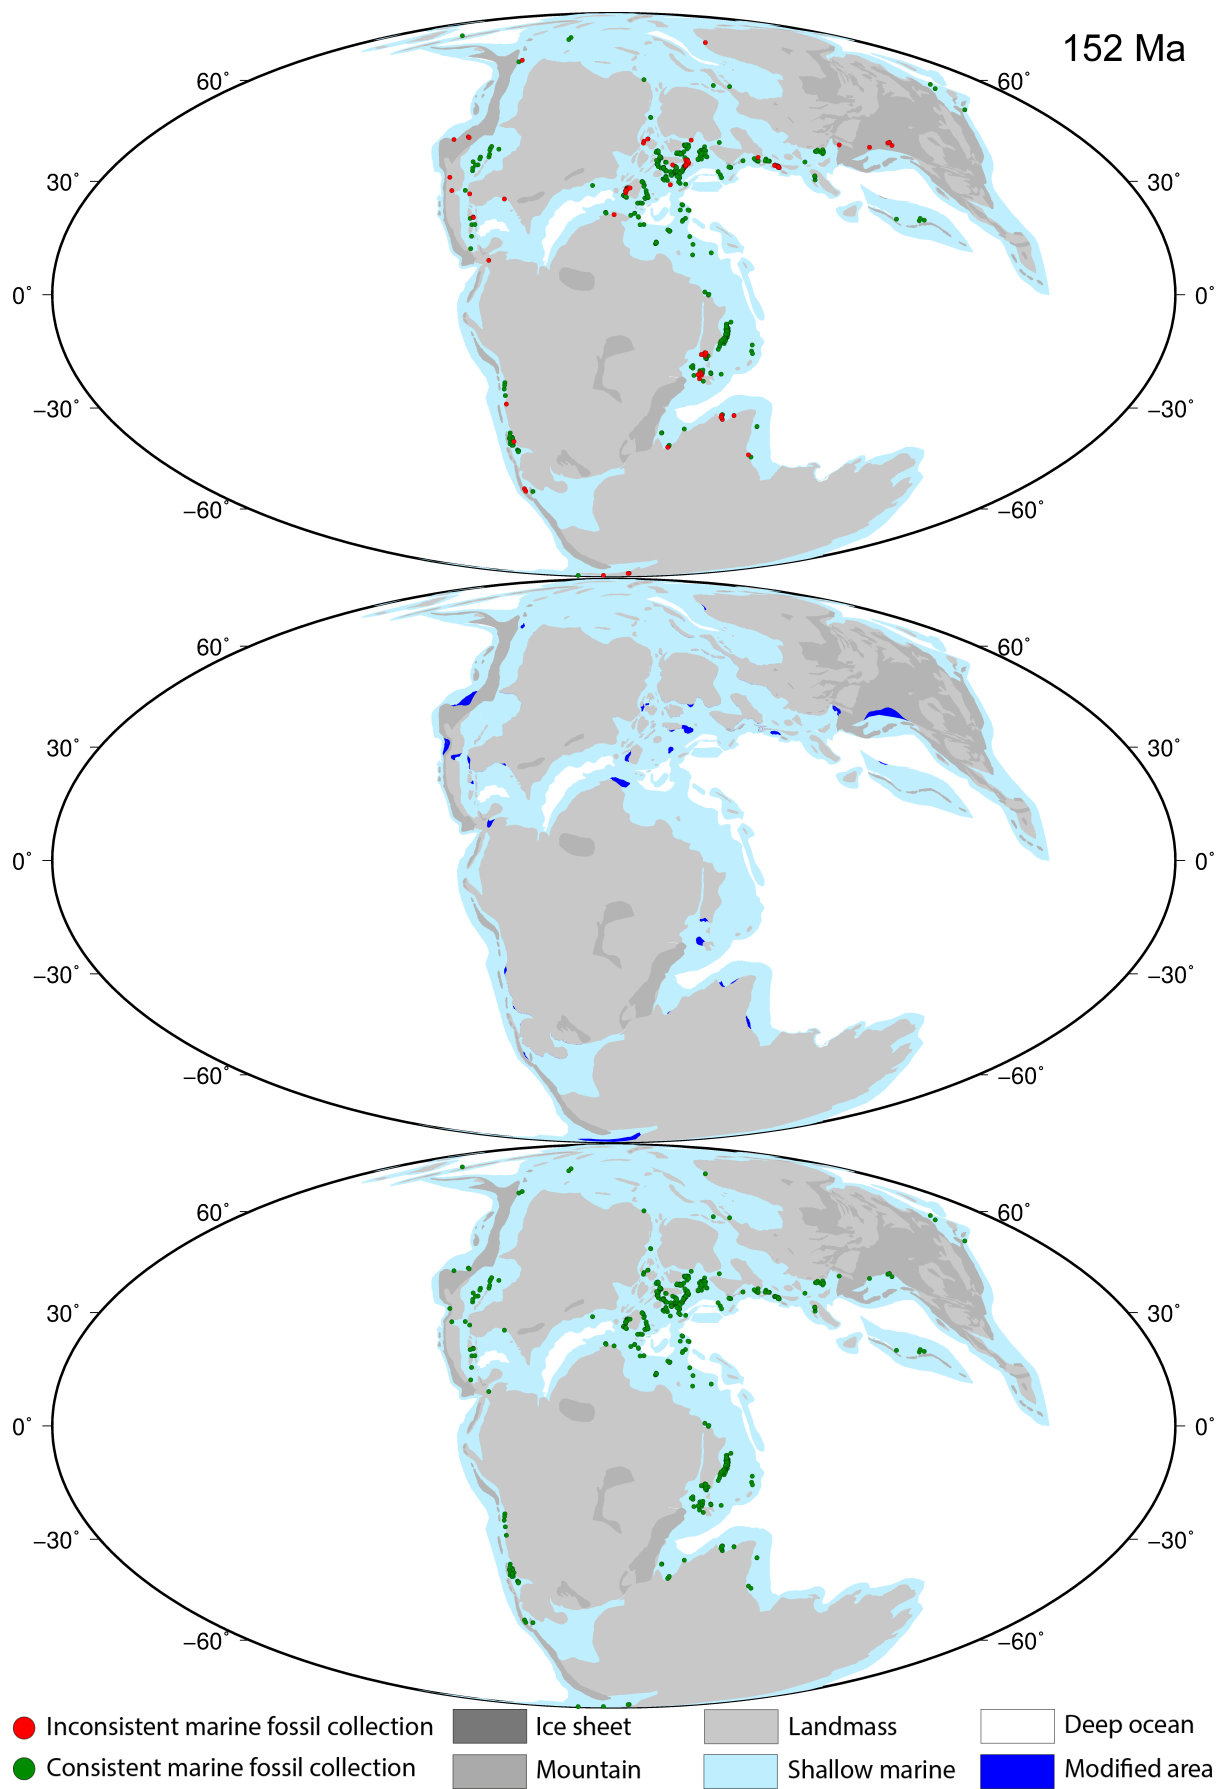

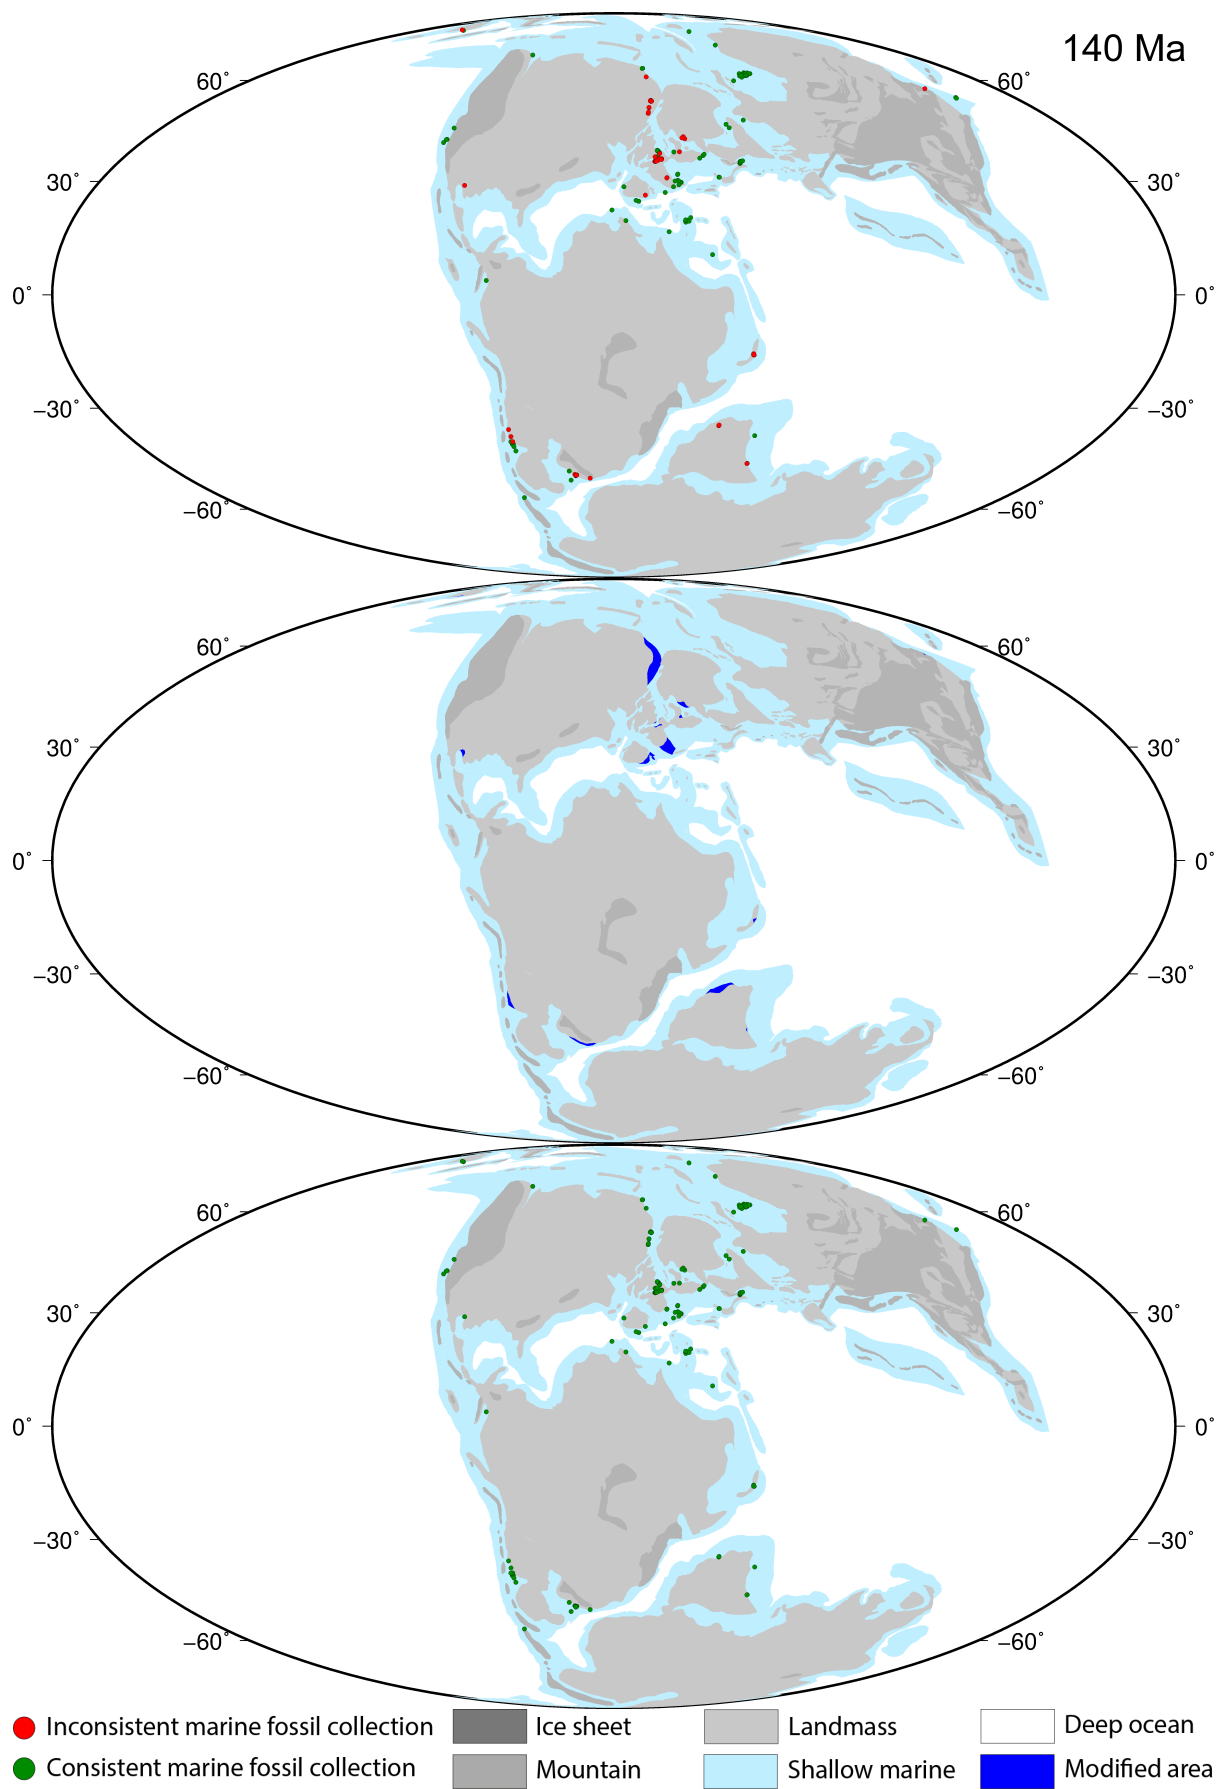

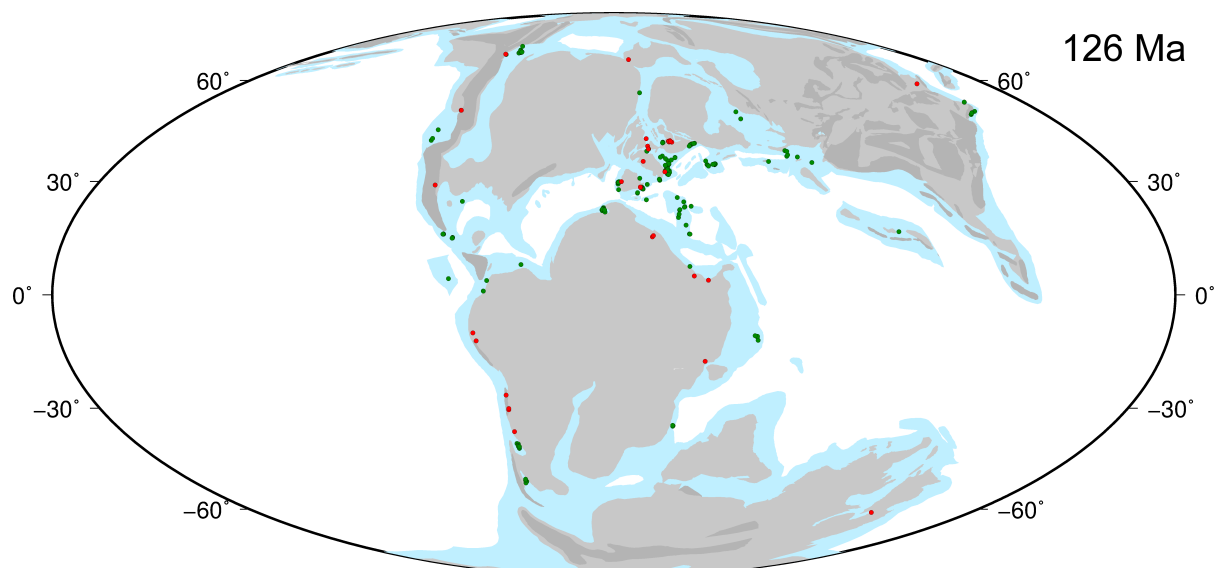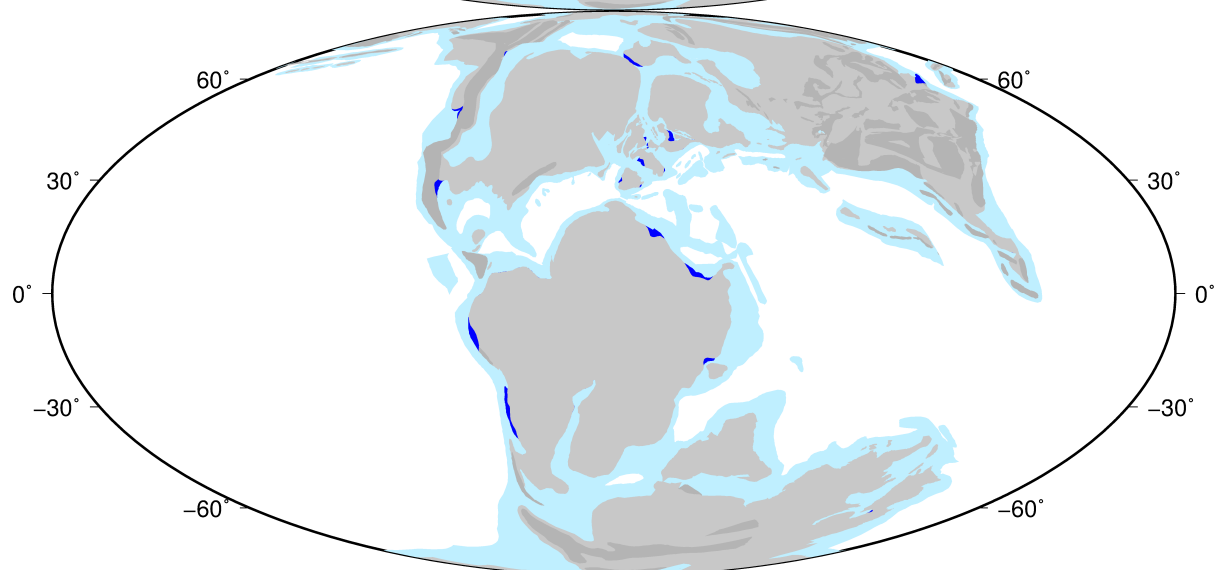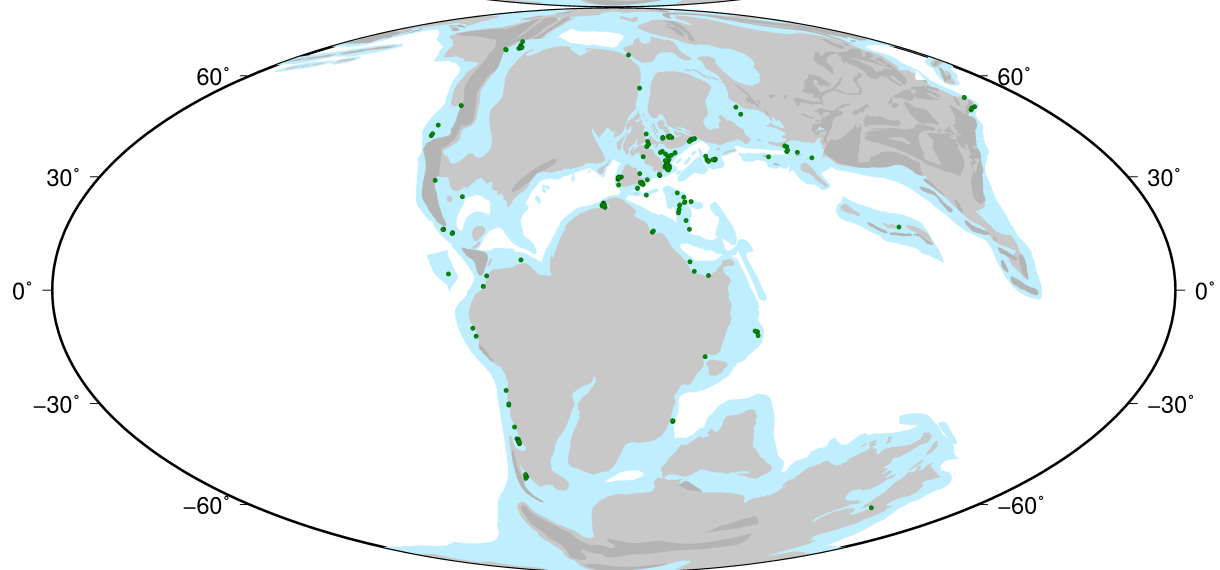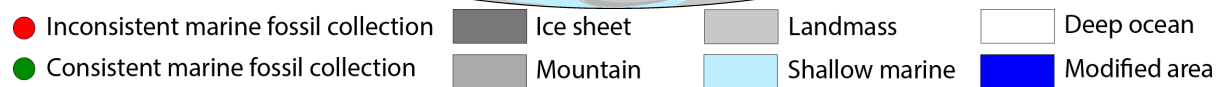

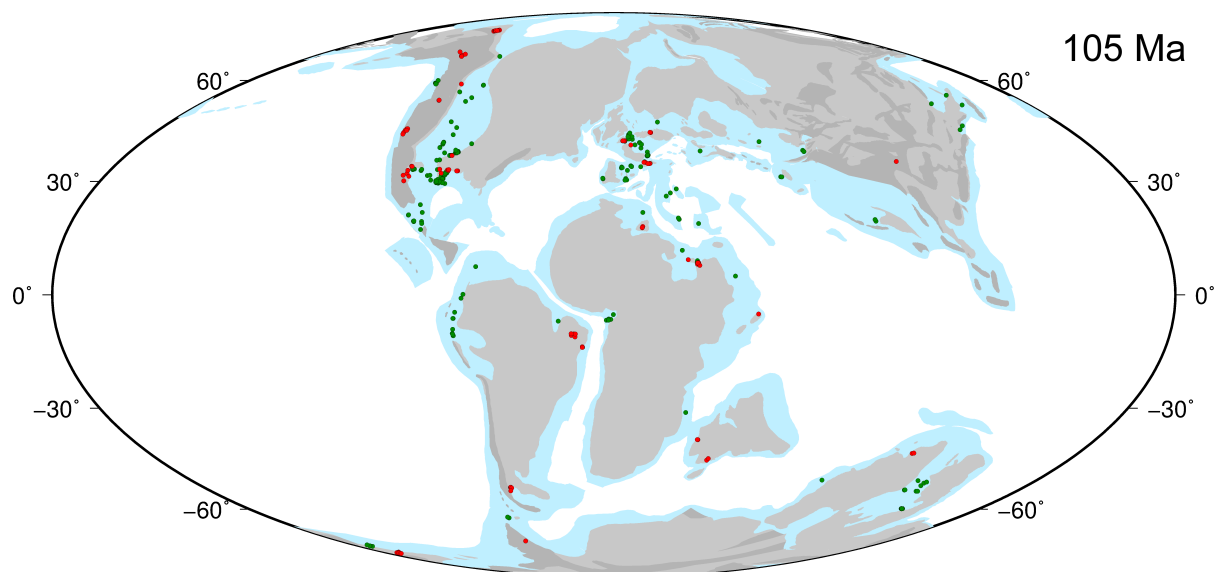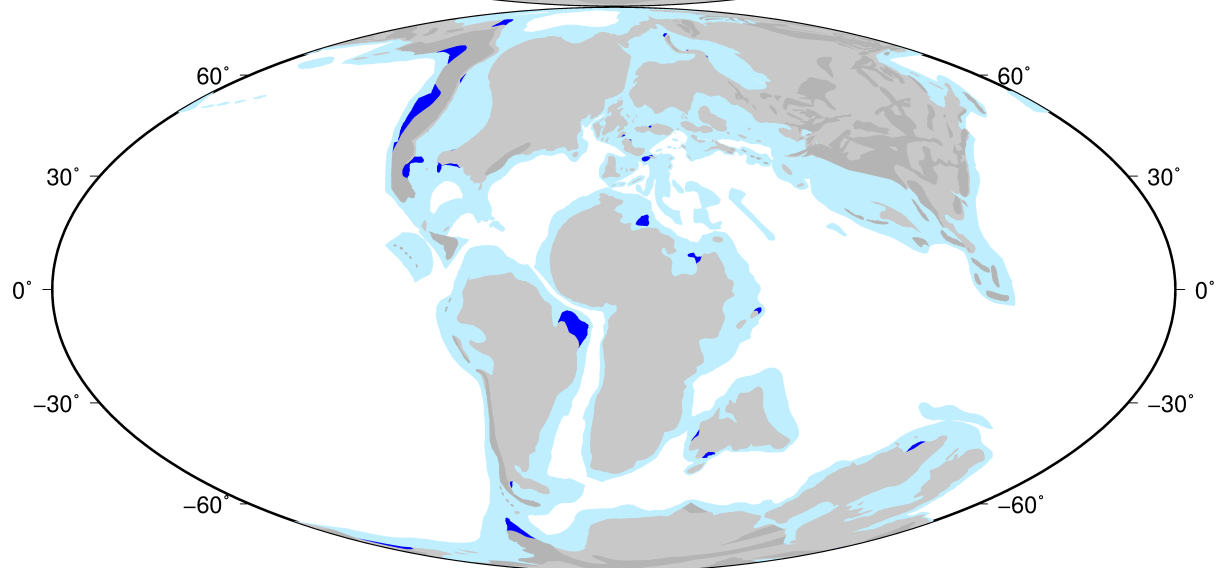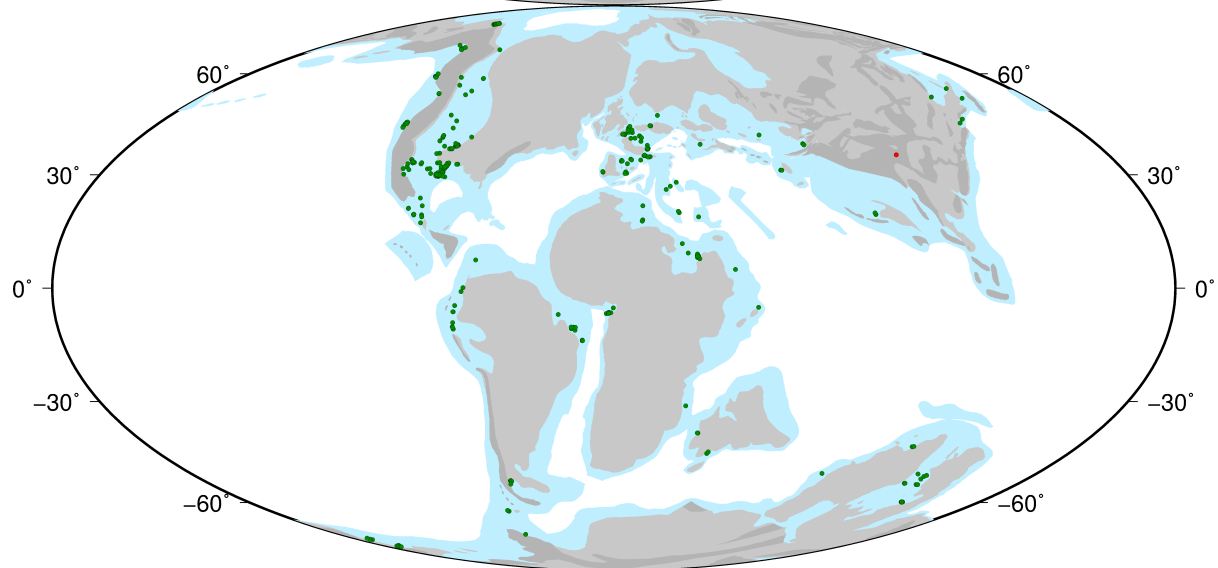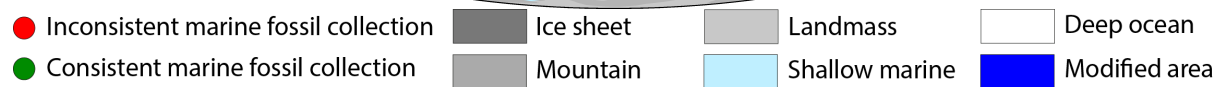

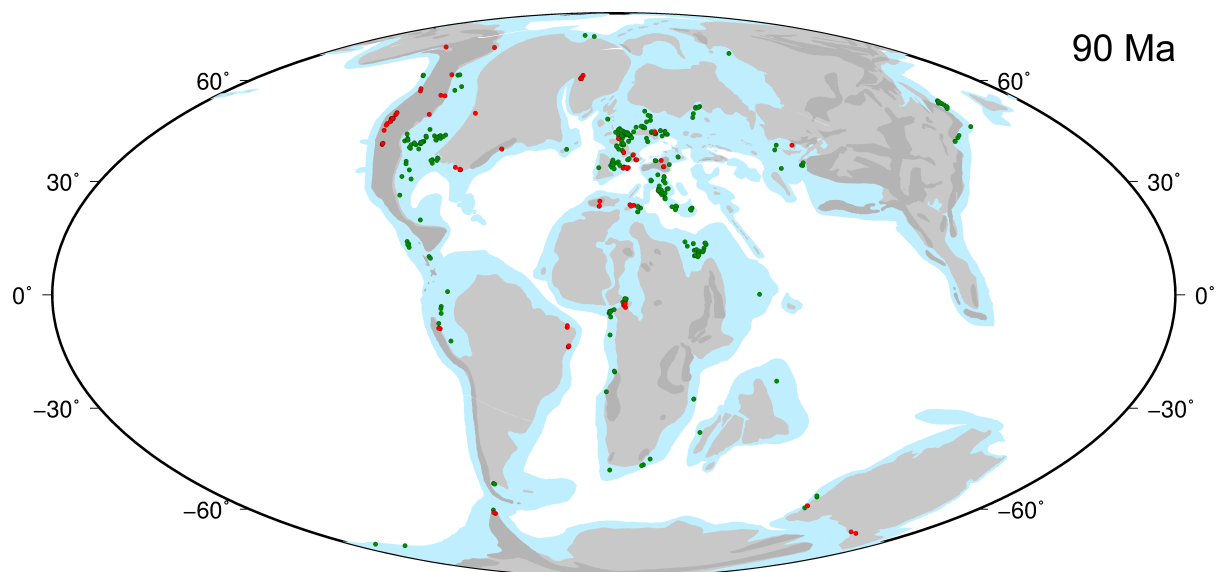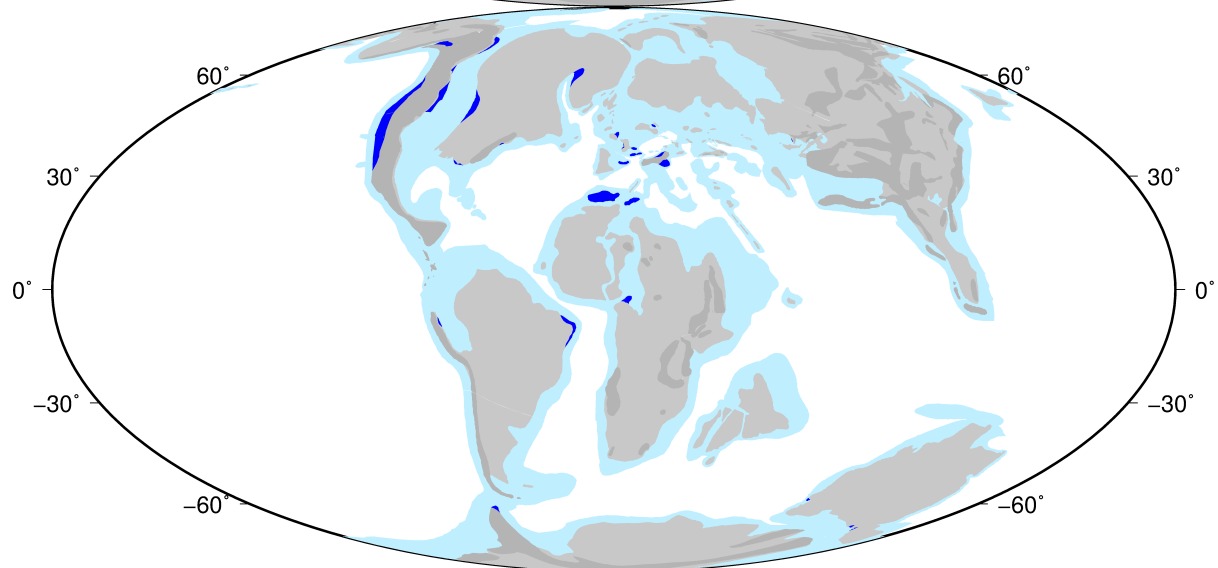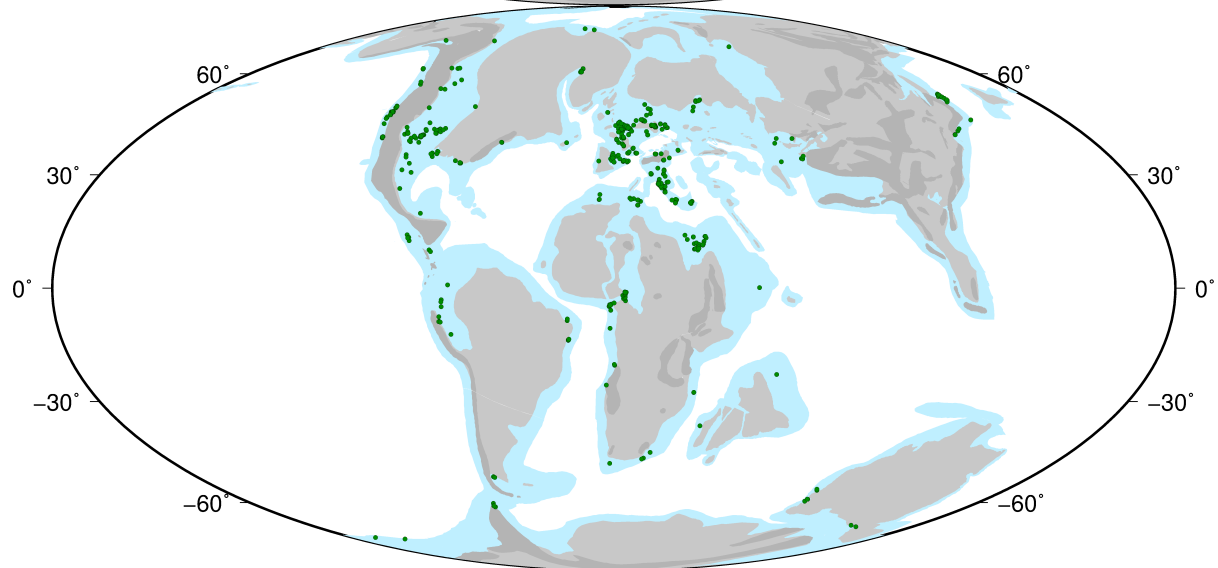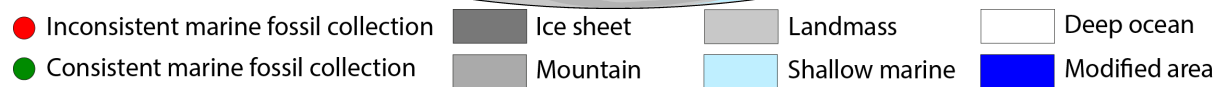



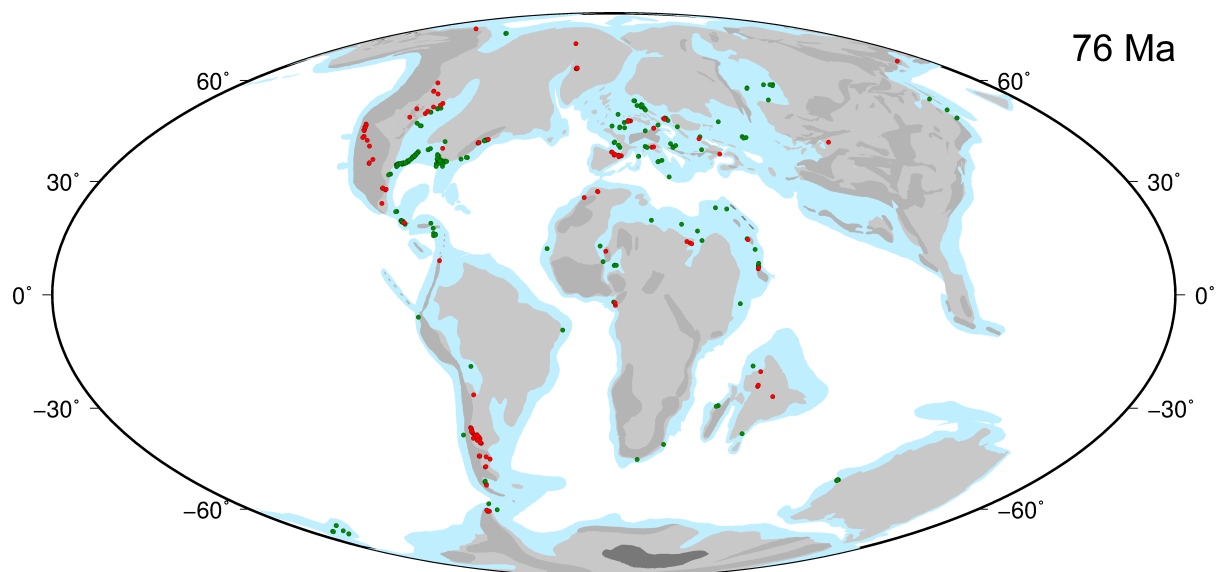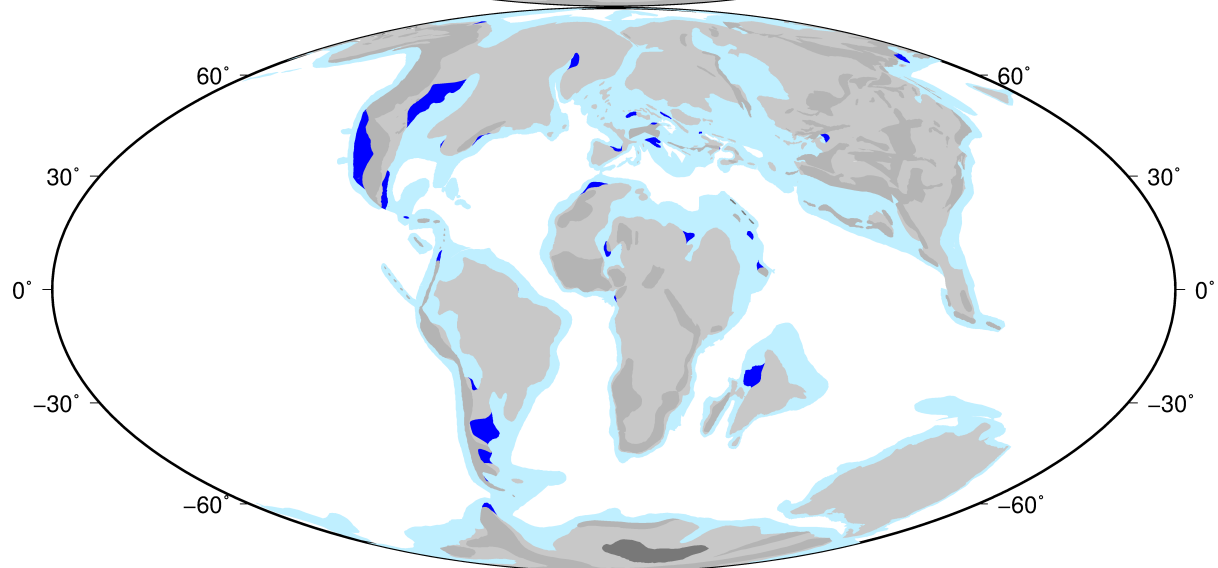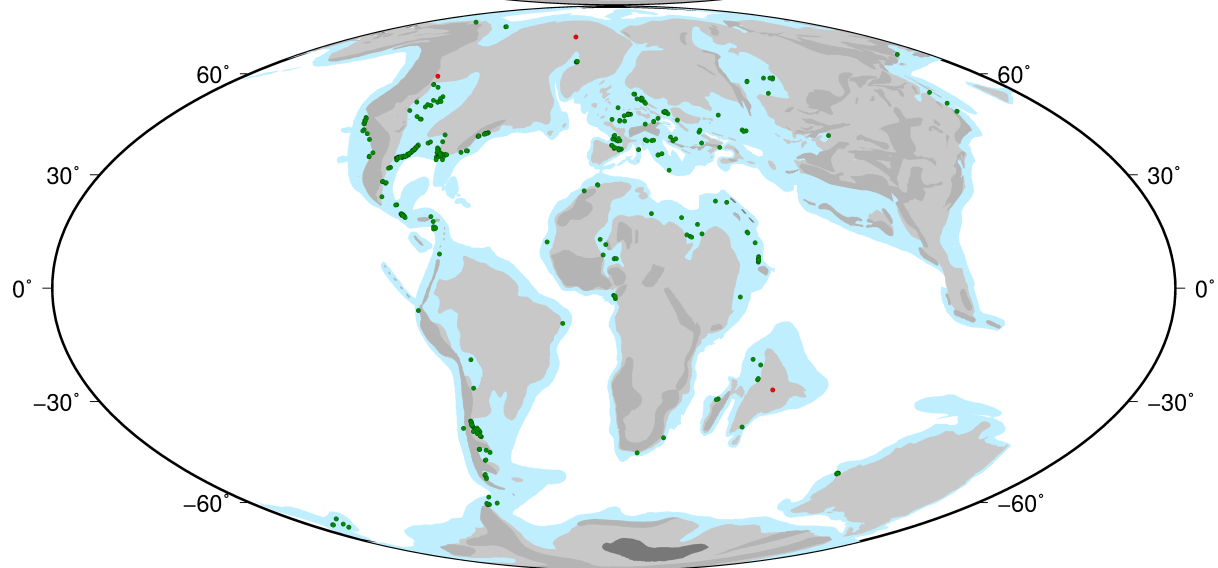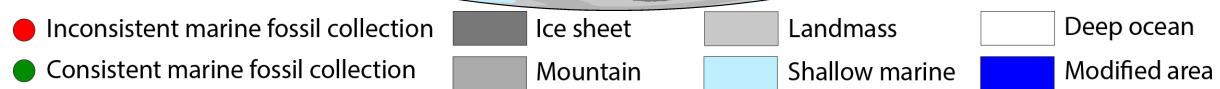

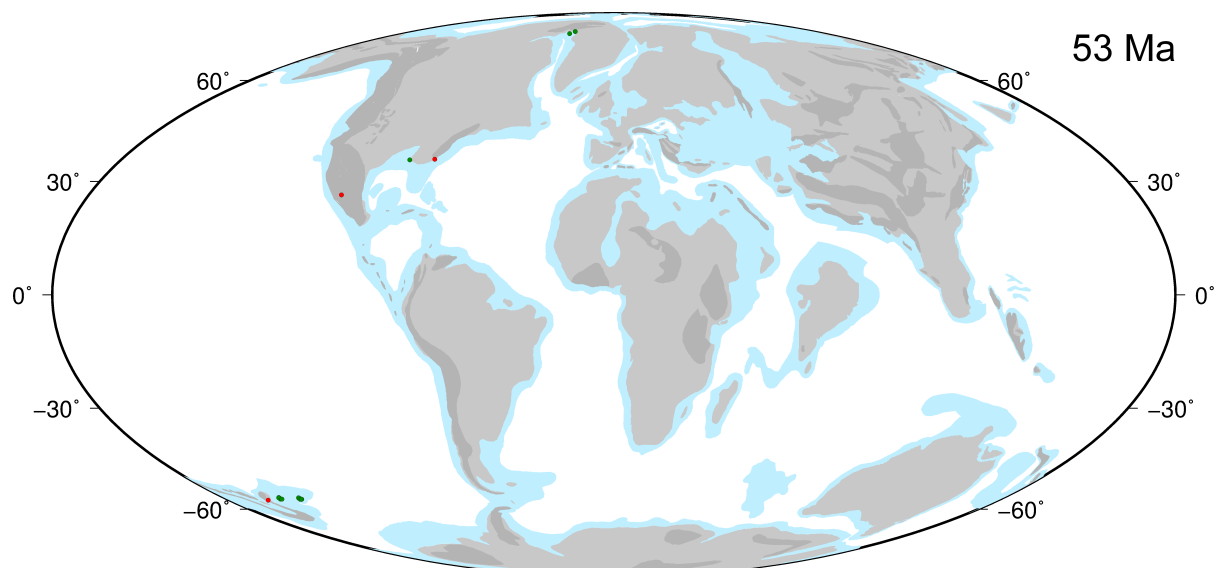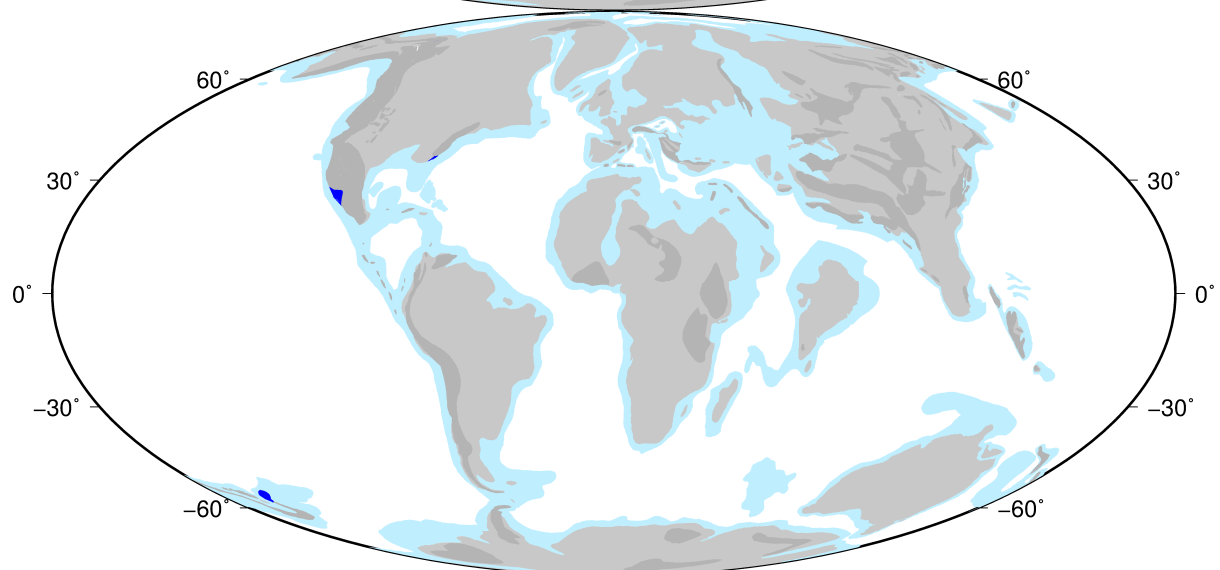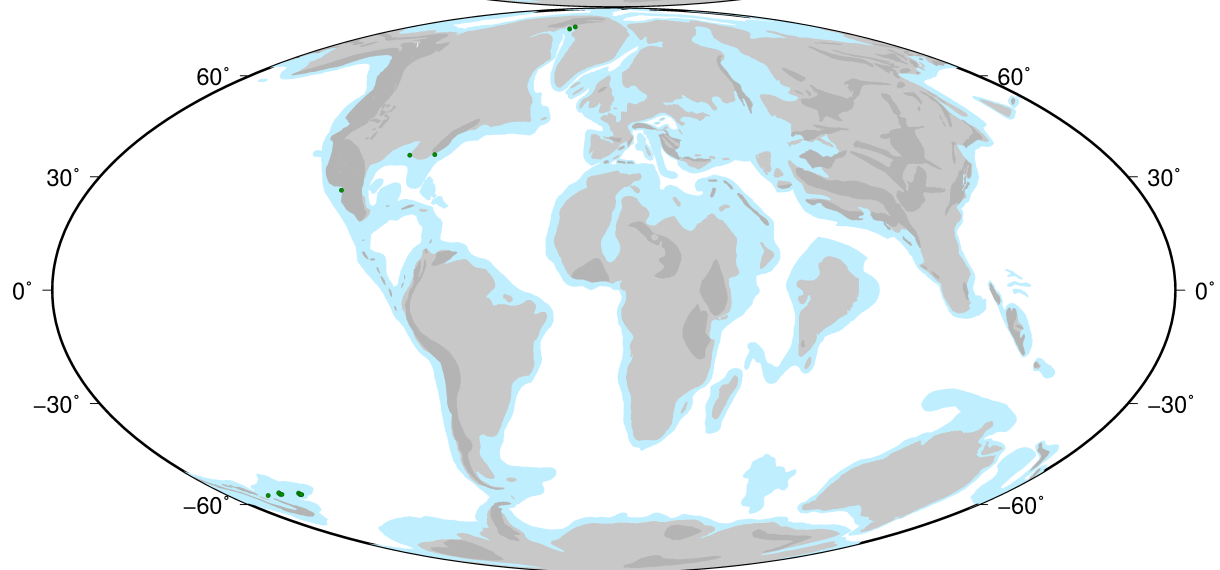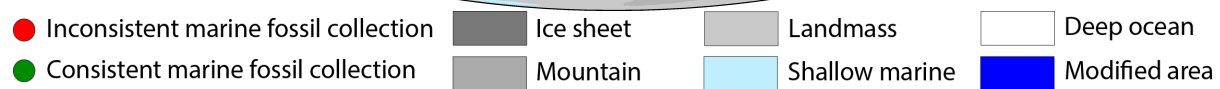

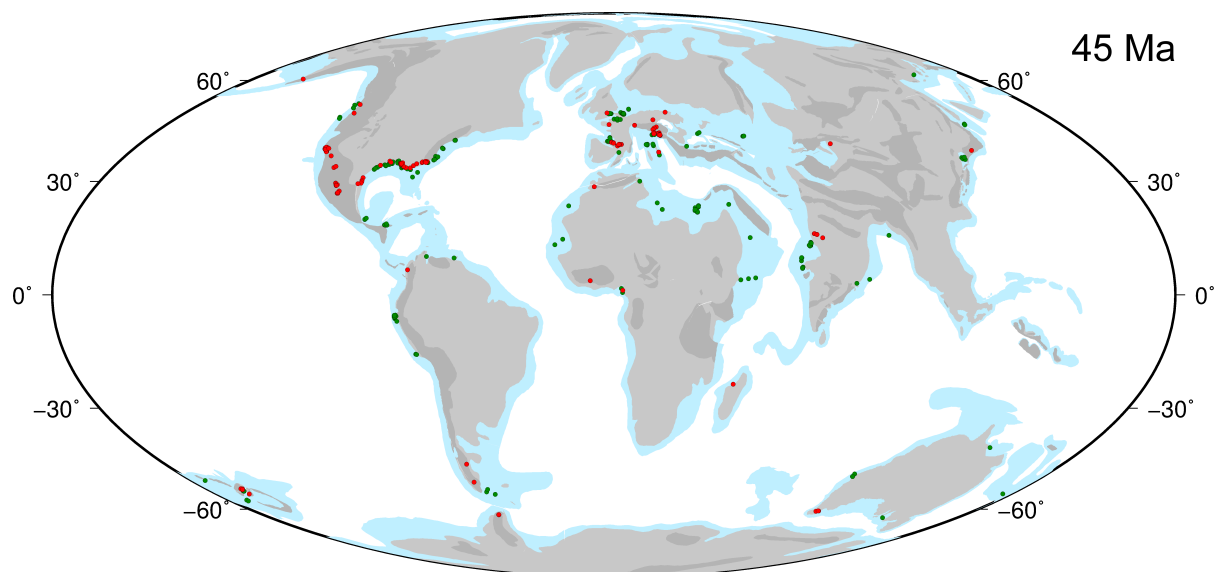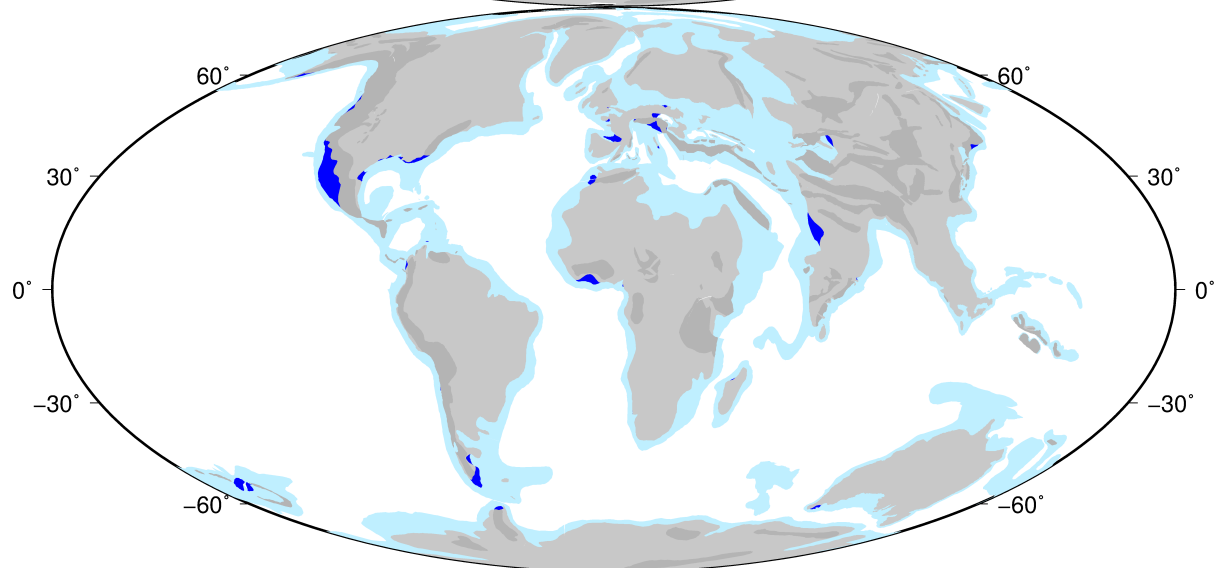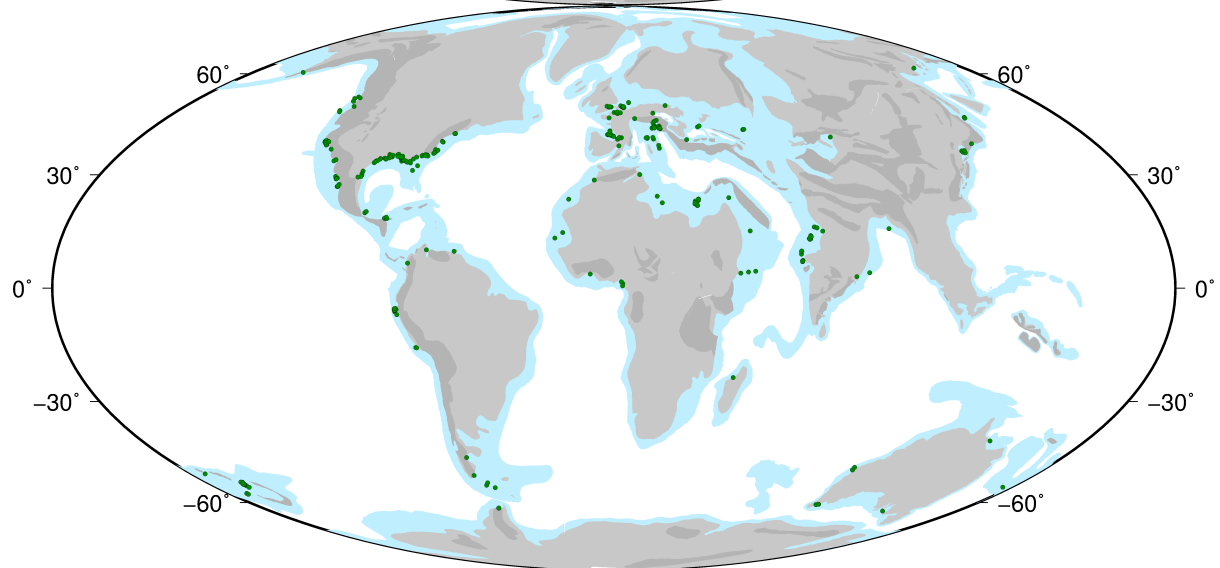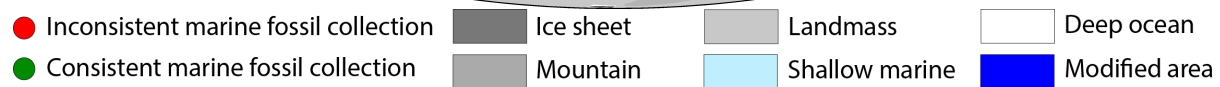

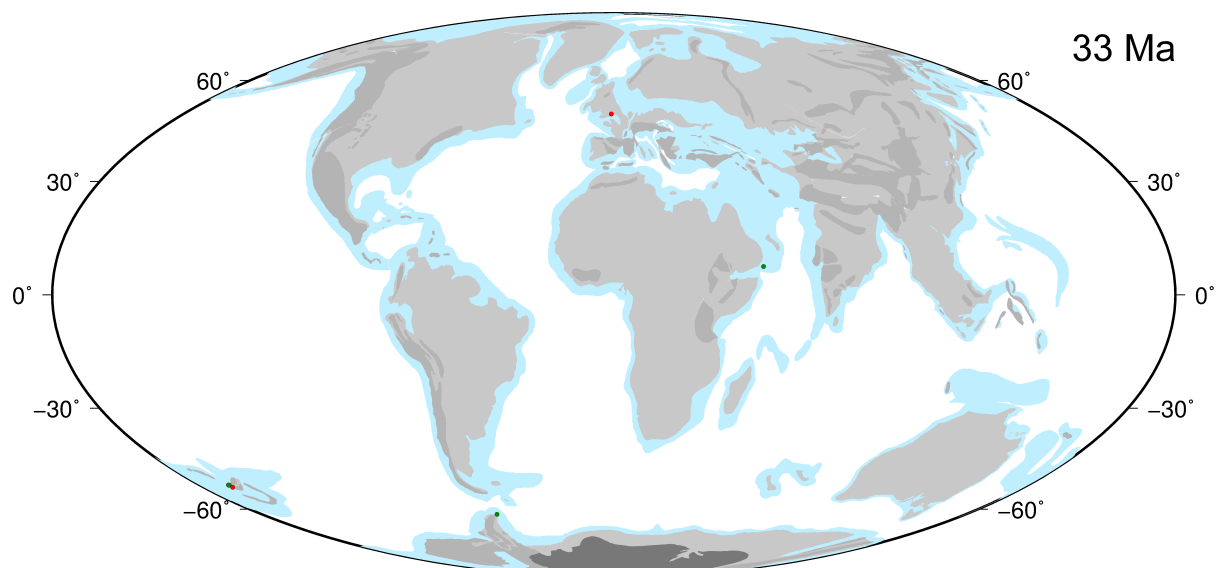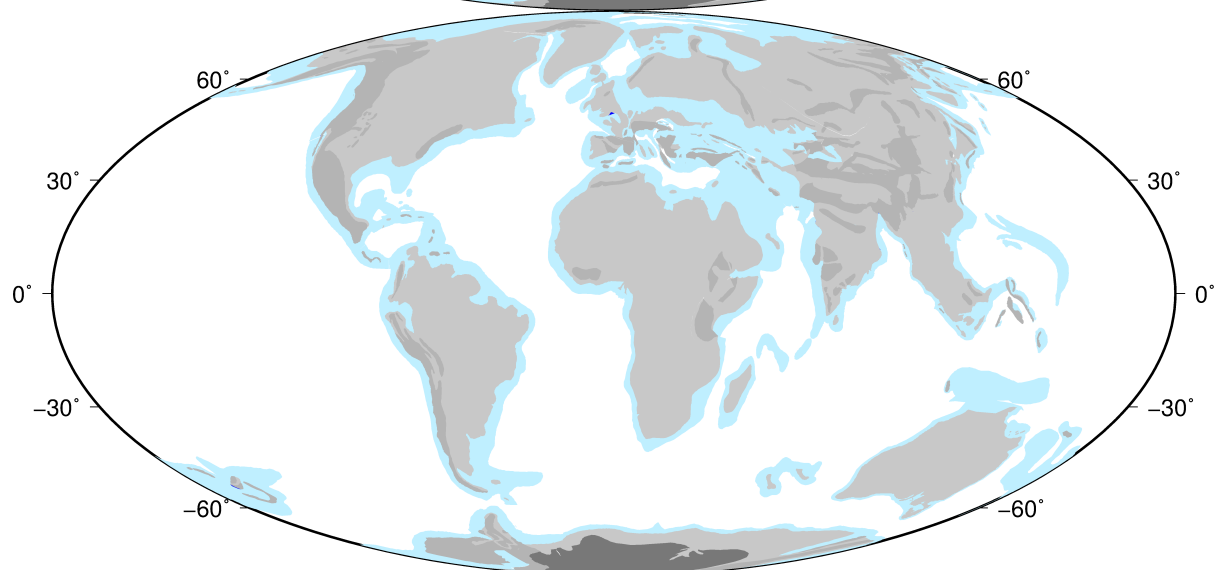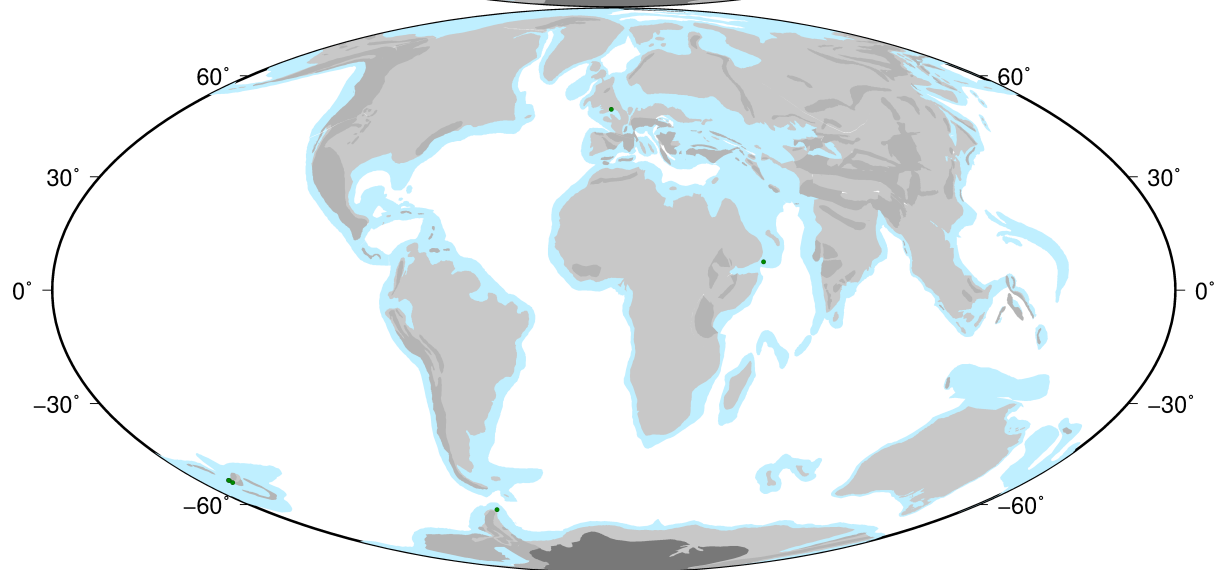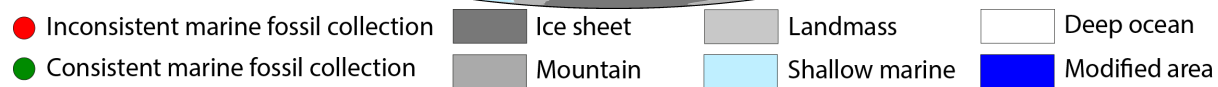

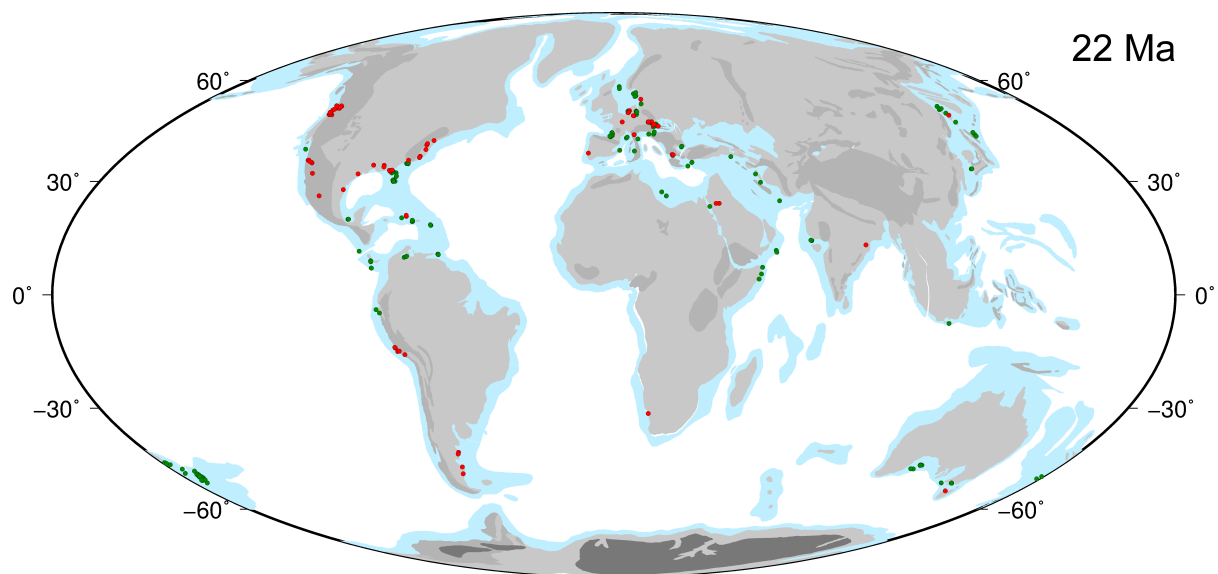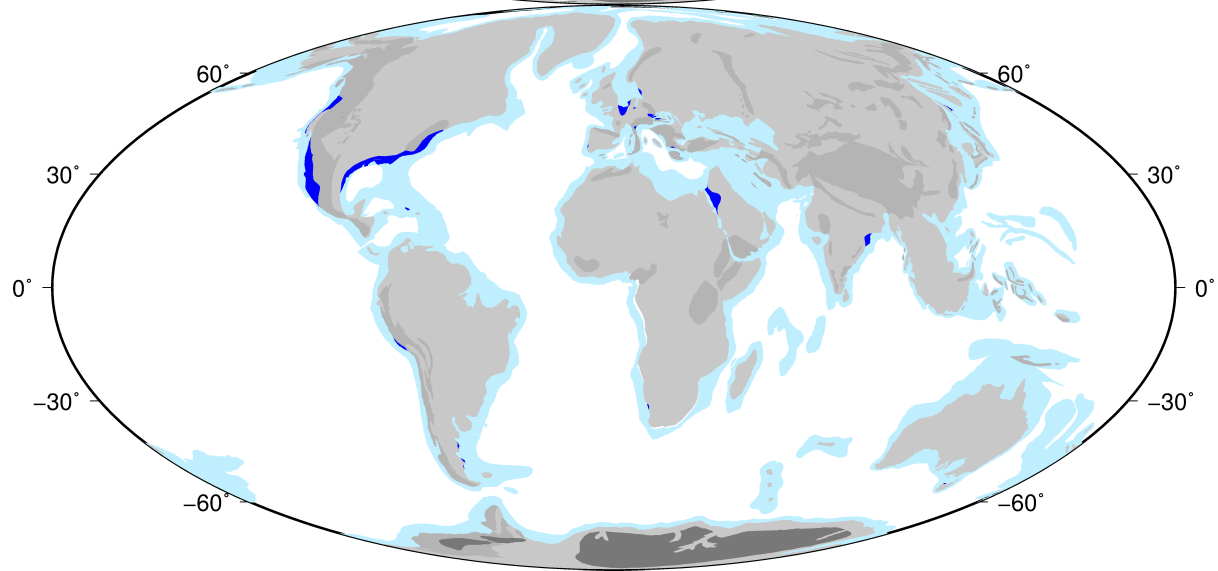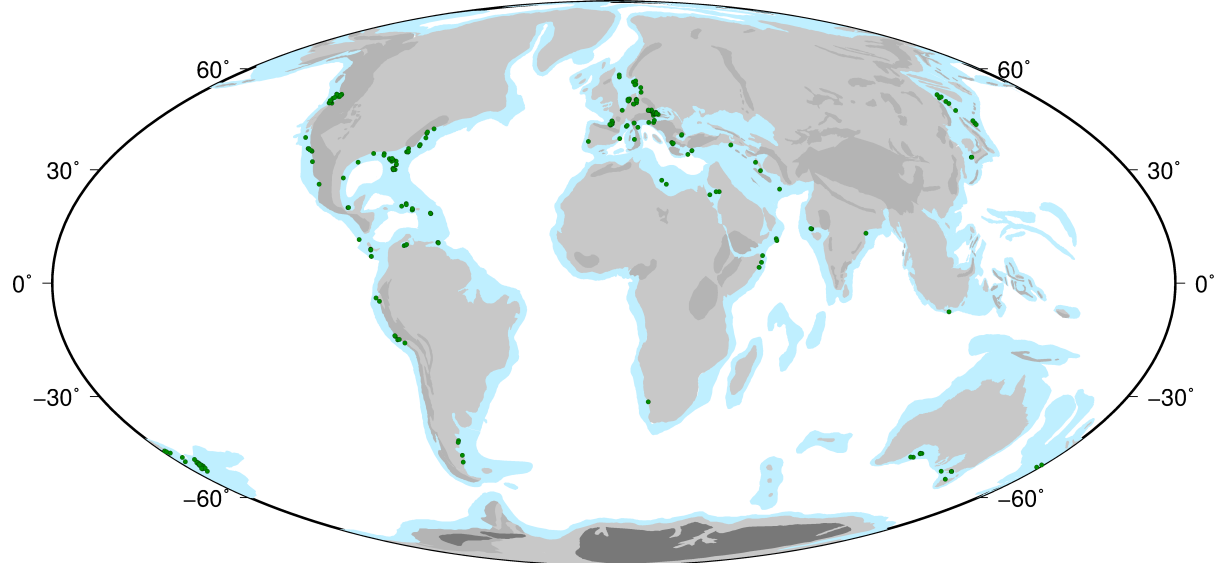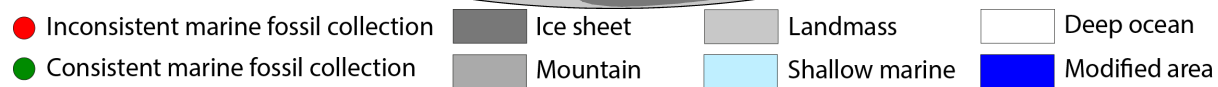

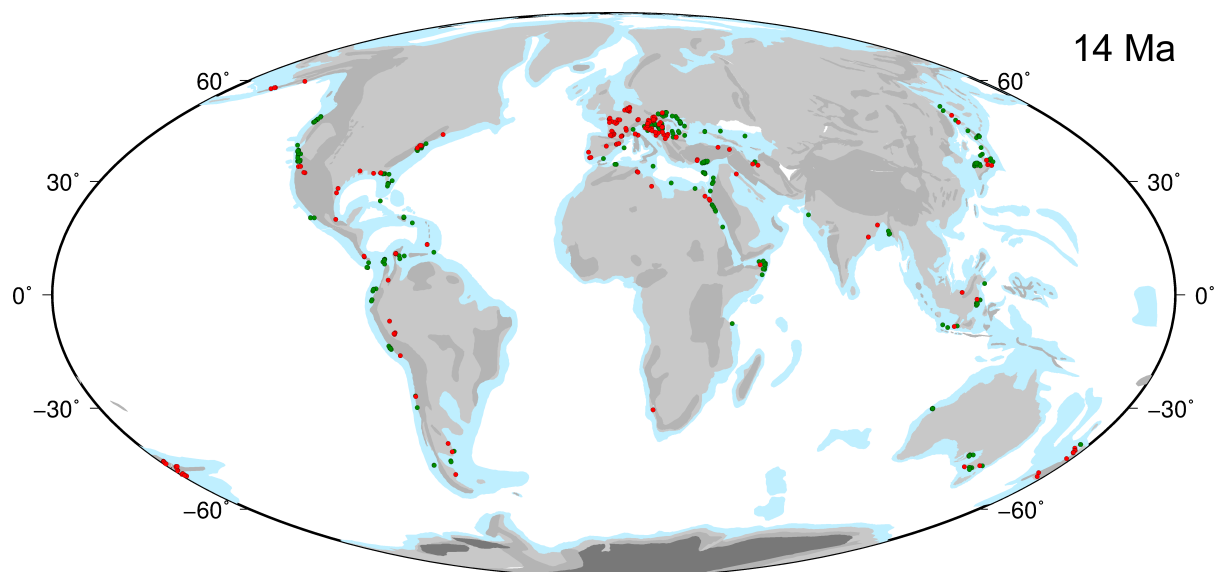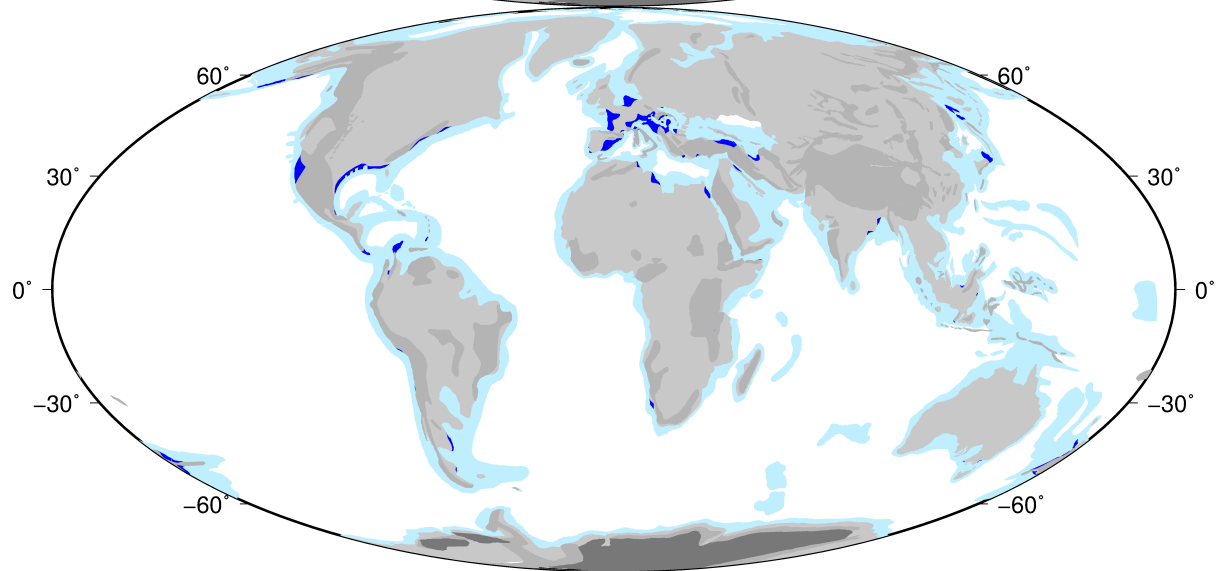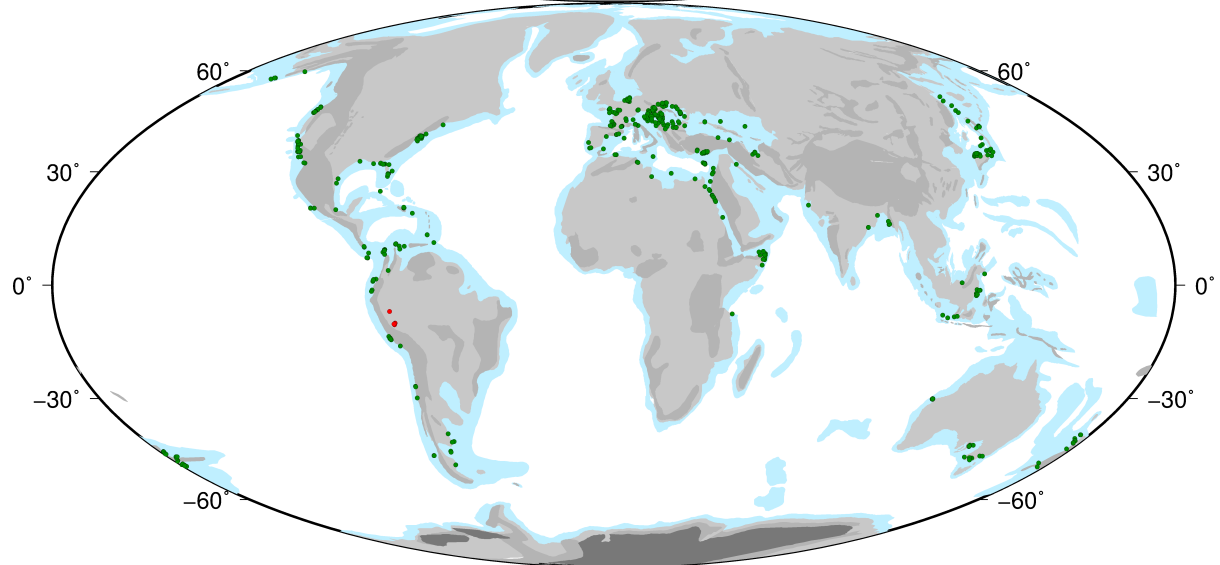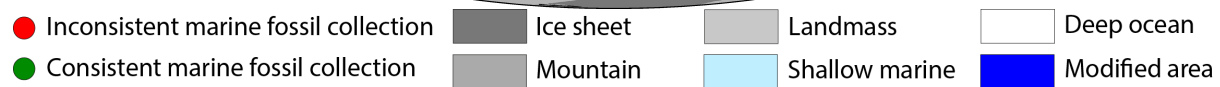

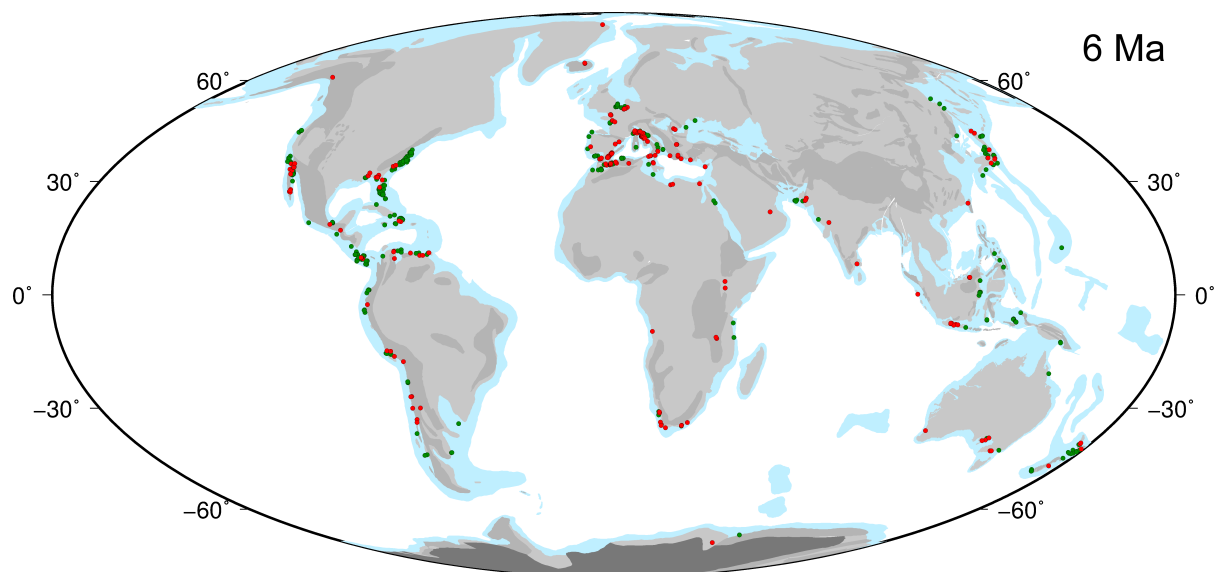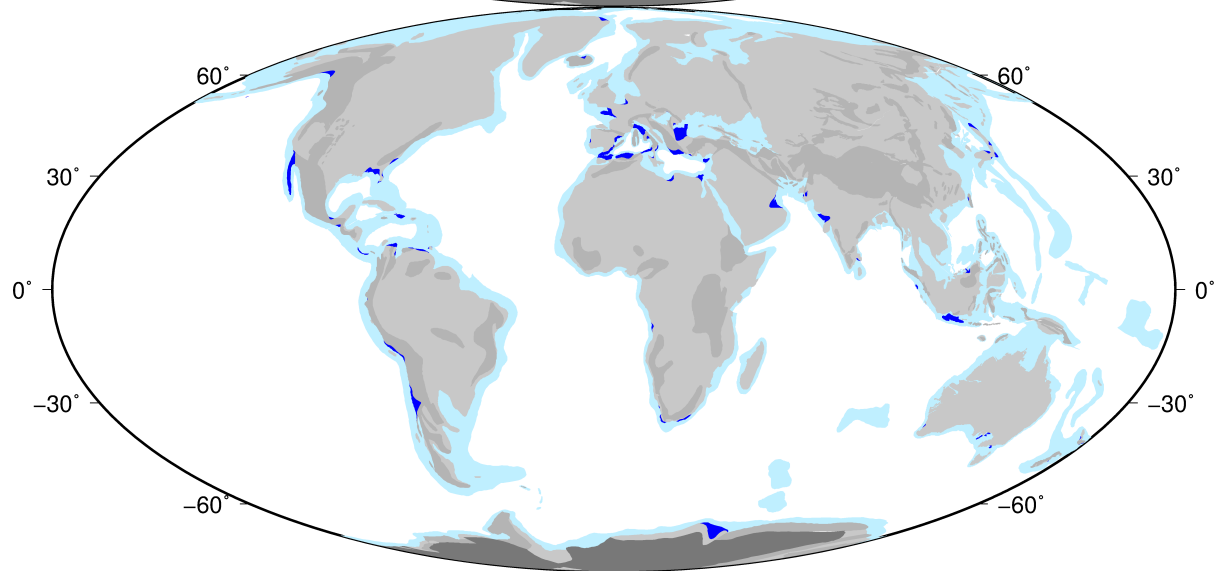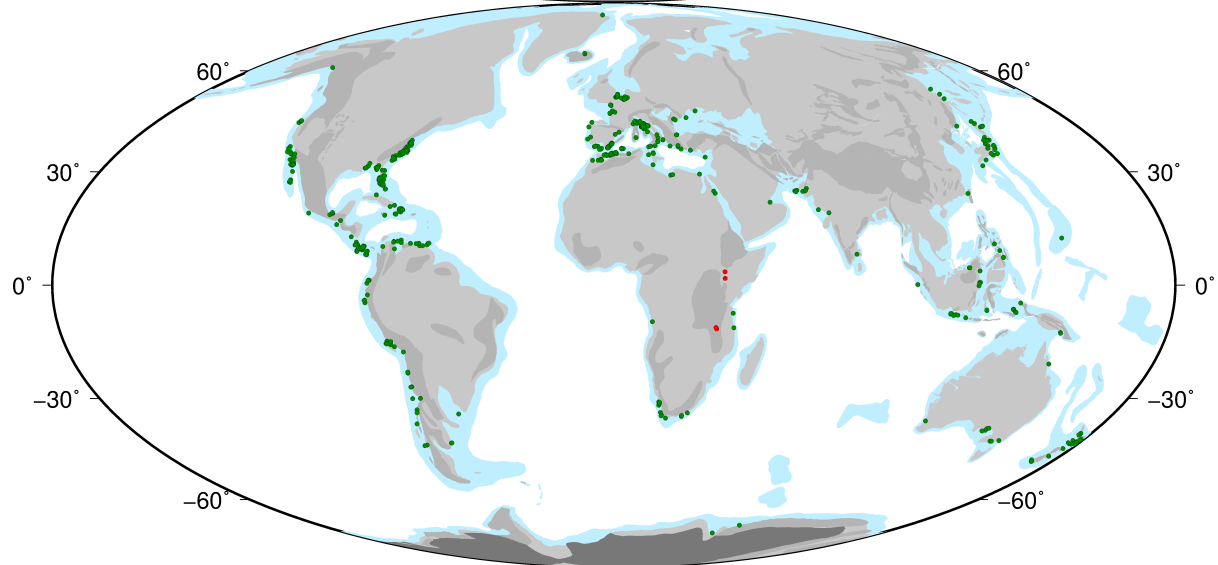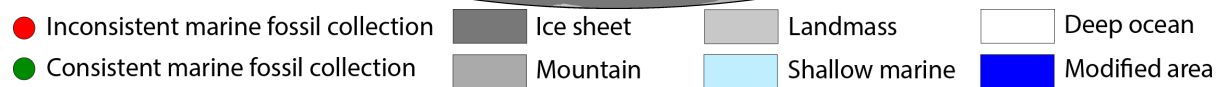

Supplement: Supplementary file [file bg-2017-94-AC1-supplement.zip]
