# Supplementary material for: Improving global paleogeography since the latePaleozoic using paleobiology
Source: Copernicus journal article supplement (doi:10.5194/bg-2017-94), 2017-04-18
Supplement: Supplementary file [file bg-2017-94-RC1-supplement.zip]

**Table 1. Time scale of Golonka et al. (2006)'s paleo-maps since the Early Devonian, their numerical equivalents as defined by Sloss (1998), and corresponding reconstruction times.**

| Era       | Epoch                                          |                  | Nominal Age        | Sloss (1988)   |              | Reconstruction |     |
|-----------|------------------------------------------------|------------------|--------------------|----------------|--------------|----------------|-----|
|           |                                                |                  |                    | Start Age (Ma) | End Age (Ma) | Time (Ma)      |     |
| Cenozoic  | Tortonian-Gelasian                             | late Texas III   | Late Tejas III     | 11             | 2            | 6              |     |
|           | Burdigigalian-Serravallian                     | middle Tejas III | Late Tejas II      | 20             | 11           | 14             |     |
|           | Chattian-Aquitanian                            | early Tejas III  | Late Tejas I       | 29             | 20           | 22             |     |
|           | Priabonian Rupelian                            | Tejas II         | Early Tejas III    | 37             | 29           | 33             |     |
|           | Lutetian-Bartonian                             | late Tejas I     | Early Tejas II     | 49             | 37           | 45             |     |
|           | Thanetian-Ypresian                             | early Tejas I    | Early Tejas I      | 58             | 49           | 53             |     |
| Mesozoic  | Late Cretaceous-earliest Paleogene             |                  | Late Zuni IV       | Late Zuni II   | 81           | 58             | 76  |
|           | Late Cretaceous                                |                  | Late Zuni III      | early Zuni III | 94           | 81             | 90  |
|           | Early Cretaceous-earliest Late Cretaceous      |                  | Late Zuni II       | late Zuni II   | 117          | 94             | 105 |
|           | Early Cretaceous                               |                  | Late Zuni I        | early Zuni II  | 135          | 117            | 126 |
|           | latest Late Jurassic-earliest Early Cretaceous |                  | Early Zuni III     | late Zuni I    | 146          | 135            | 140 |
|           | Middle Jurassic-Late Jurassic                  |                  | Early Zuni II      | middle Zuni I  | 166          | 146            | 152 |
|           | Middle Jurassic                                |                  | Early Zuni I       | early Zuni I   | 179          | 166            | 169 |
|           | Early Jurassic-earliest Middle Jurassic        |                  | Late Absaroka III  | OK             | 203          | 179            | 195 |
|           | Late Triassic-earliest Jurassic                | middle Abs. III  | Late Absaroka II   |                | 224          | 203            | 218 |
|           | Early-earliest Late Triassic                   | early Abs. III   | Late Absaroka I    |                | 248          | 224            | 232 |
| Paleozoic | Late Permian                                   | late Absaroka II | Early Absaroka IV  |                | 269          | 248            | 255 |
|           | Early Permian                                  | early Absorka II | Early Absaroka III |                | 285          | 269            | 277 |
|           | latest Carboniferous-earliest Permian          |                  | Early Absaroka II  |                | 296          | 285            | 287 |
|           | Late Carboniferous                             |                  | Early Absaroka I   |                | 323          | 296            | 302 |
|           | Early Carboniferous                            |                  | Kaskaskia IV       |                | 338          | 323            | 328 |
|           | latest Devonian-Early Carboniferous            |                  | Kaskaskia III      |                | 359          | 338            | 348 |
|           | Middle-Late Devonian                           |                  | Kaskaskia II       |                | 380          | 359            | 368 |
|           | Early-Middle Devonian                          |                  | Kaskaskia I        |                | 402          | 380            | 396 |

late Absaroka I  
early Absaroka I  
late Kaskaskia II  
early Kaskaskia II  
late Kaskaskia I  
early Kaskaskia I
